# Supplementary material
Source: PubMed Central journal article supplement (PMC5988435)
Supplement: NIHMS966593-supplement-supplement_1.pdf [file NIHMS966593-supplement-supplement_1.pdf]

## Materials

Antibodies were obtained from the following sources: CK19 (TROMA-III) from the Developmental Studies Hybridoma Bank, University of Iowa;  $\beta$ -actin (A5316) and anti-GLDC (HPA002318) from Sigma-Aldrich; Glut1 (ab652) from Abcam; PCNA (13110), Cleaved caspase 3 (9579), DNMT1 (5032), DNMT3A (2160), histone H3 (4499), histone 3 trimethyl-lysine 4 (9727), histone 3 trimethyl-lysine 27 (9733) and histone 3 trimethyl-lysine 36 (4909) from Cell Signaling Technology; 5-methylcytosine 33D3 (MABE146) and 5-hydroxymethylcytosine HMC-MA01 (MABE317) from Millipore. Laminin (23017-95), 2NBDG (N13195), DCFDA (C6827), CellROX Green (C10444), CyQuant NF (C35006), bovine pituitary extract (13038-14), HBSS, RPMI, DMEM, DMEM:F12, MEM penicillin-streptomycin, pyruvate solution, fetal bovine serum (FBS) Alexa 488 and 568-conjugated secondary antibodies from Life Technologies; nicotinamide (N3376), trypsin inhibitor (T6522), dexamethasone (D4902), S-adenosylmethionine (A2408), 3,3,5-triiodo-L-thyronine (91990), oligomycin (75351), antimycin A (A8674), 2-deoxyglucose (D6134), dichloroacetate (347795), collagenase (C7657), glucose (G7528), aminoxyacetate (C13408), N-acetylcysteine (A9165), adenosine (A4036), guanosine (G6264), thymidine (T1895), uridine (U3003), cytidine (C4654), cycloleucine (A48105), cholera toxin (C8052), L-serine (S4500), betaine (61962), dimethylglycine (D1156), tamoxifen (T5148) and methylene blue (M4159) from Sigma; FCCP (0453), decitabine (2624), RG108 (3295), EGCG (4524), Compound C (3093), Torin 1 (4247) and galloflavin (4795) from Tocris; mouse EGF (354001), NuSerum IV (355104), ITS+ Premix (354352) and matrigel (354234) from Corning; SGI1027 (S7276) from Selleckchem; caspase-Glo 3/7 kit (G811A) and Celltiter-Glo kit (G755B) from Promega;  $^{13}\text{C}$ -U-Glucose (CLM-1396-1) and  $^{15}\text{N}$ -Glutamine (NLM-1016-1) from Cambridge Isotope Laboratories Inc; dispase (165-859) from Roche; lactate assay kit (K607-100) from Biovision Inc; Vectashield with DAPI (H1500) from Vector Laboratories; Bridge-IT SAM

assay kit (1-1-1003B) from Medionics; meDIP kit (55009) from Active Motif; 3DZA (9000785) from Cayman Chemicals; Adeno-FlpO (1760) from Vector Biolabs; Adeno-Cre-eGFP from the Viral Vector Core Facility, University of Iowa.

### **Genetically engineered mouse models**

Mice were housed in pathogen-free animal facilities at Massachusetts General Hospital (MGH). All experiments were conducted under protocol 2005N000148, approved by the Subcommittee on Research Animal Care at MGH. The following mouse strains were used: LSL KRAS<sup>G12D/+</sup> <sup>1</sup>, FSF KRAS<sup>G12D/+</sup> (Jackson Laboratory, strain #023590), LKB1<sup>L/L</sup> <sup>2</sup>, Sox9-Cre<sup>ER</sup> <sup>3</sup>. Mice were maintained on a mixed genetic background and each genotype was generated from intercrosses from the same colony. The Sox9-CreER transgene deletes floxed sequences in pancreatic ductal cells following treatment with tamoxifen. To activate Cre<sup>ER</sup>, 8 week-old mice were injected intraperitoneally with 100 mg/kg tamoxifen dissolved in corn oil every other day for 6 days. Mice were euthanized when criteria for disease burden were reached (including abdominal distension that impeded movement, loss of >15% of body weight, labored breathing, and/or abnormal posture). Both male and female animals were used for these experiments.

### **Cell Culture**

Primary pancreatic ductal epithelial cells were isolated from two LSL-KRAS<sup>G12D/+</sup>, two LSL-KRAS<sup>G12D/+</sup>;LKB1<sup>L/L</sup> or three FRT-KRAS<sup>G12D/+</sup>;LKB1<sup>L/L</sup> mice as previously described<sup>4</sup> with modifications. In brief, mice were euthanized and the pancreata were rapidly collected, followed by microscopy-assisted removal of the bile duct. Tissues were washed once in PBS, suspended in 3-5 ml of 2 mg/ml collagenase in DMEM:F12 (filter sterilized) and incubated at 37°C for 15 min with rigorous agitation. 7-10 ml of PBS was added to each tube, the homogenate was left to settle for 5 min at room temperature and

the supernatant containing mainly acinar cells was discarded. The remaining tissue was transferred in 6 cm plates, mechanically dissociated with blades/scissors, transferred to a new tube, suspended in 2 ml freshly prepared dispase solution (4 mg/ml in PBS, filter sterilized) and incubated at 37°C for 8-10 min with agitation. Dispase was inactivated by addition of 10 ml G solution (sterile HBSS, 0.9 µg/L Glucose, 1X Pen/Strep). To capture the largely intact ductal structures and clear dissociated acinar cells, homogenate was filtered through a 100 µm strainer that retained only the ducts. After washing with G solution, ducts were recovered by inverting the strainer and washing it with 50 ml G solution followed by gently pelleting by centrifugation at 1000 rpm for 1 min. Supernatant was aspirated and ducts were washed twice more with 50 ml G solution each time. After the last wash, pellet was suspended in 2 ml trypsin, incubated for 5 min at room temperature then trypsin was inactivated by addition of 10 ml DMEM+10% FBS+1X Pen/Strep. Cells were collected by centrifugation, washed twice in ductal media (DMEM:F12, 5 mg/ml Glucose, 1.22 mg/ml nicotinamide, 5 nM 3,3,5-tri-iodo-L-thyronine, 1 µM Dexamethasone, 100 ng/ml cholera toxin, 5 ml/L ITS+, 1X Pen/Strep, 0.1 mg/ml trypsin inhibitor, 20 ng/ml mouse EGF, 5% NuSerum IV and 25 µg/ml bovine pituitary extract) and plated. To activate KRAS and/or delete LKB1 in the LSL-KRAS<sup>G12D/+</sup> and LSL-KRAS<sup>G12D/+</sup>;LKB1<sup>L/L</sup> cells, cultures were infected with Ad-CreGFP (1-5x10<sup>6</sup> pfu/ml) leading to K and KL cells (Extended Data Figure 1A). Alternatively, in order to generate all four genotypes (WT, K, L, KL), FRT-KRAS<sup>G12D/+</sup>;LKB1<sup>L/L</sup> primary ductal cells were infected with Adeno-Cre-eGFP and/or Adeno-FlpO to delete LKB1 or activate KRAS<sup>G12D</sup> respectively, while uninfected cells were used as WT (Extended Data Figure 1A). All pancreatic ductal epithelial cells were routinely maintained in ductal media on laminin-coated plates. KPC and KIC cells murine pancreatic cancer cells were derived from the Pdx1-Cre;KRAS<sup>G12D/+</sup>;p53<sup>Lox/+</sup>;p16<sup>+/-</sup> and Pdx1-Cre;KRAS<sup>G12D/+</sup>;CDKN2A<sup>Lox/+</sup> GEMM, respectively<sup>5</sup>. Human cancer cell lines were obtained from the American Type Culture

Collection (PANC1, YAPC, 8988T), the Korean Cell Line Bank (SNU324), and Dr. Paul Chiao from MD Anderson Cancer Center (COLO357), and cultured in the following media: PANC1, YAPC, 8988T in DMEM supplemented with 10% FBS; COLO357, SNU324 in RPMI with 10% FBS. Status of LKB1 gene was validated by genomic sequencing and western blot analysis. Negative mycoplasma contamination status of all cancer cell lines and primary cells used in the study was established using LookOut Mycoplasma PCR Kit (Sigma, MP0035). STR profiling of all human cell lines was done at the Center for Molecular Therapeutics at Massachusetts General Hospital.

### **Cell proliferation, IC50 determination, and caspase 3/7 activity assays**

For growth assays, cells were plated at a density of 1000 cells per well in black 96-well plates, using 3-4 replicates per time point and/or condition, and allowed to attach overnight. Cell growth was assessed by DNA content measurement using the Cyquant NF kit according to the manufacturer's instructions. Day 0 was considered the day after the initial seeding. For the inhibitor studies, the concentration used in each case was as follows: 5 mM 2-deoxyglucose, 5 mM dichloroacetate, 20  $\mu$ M galloflavin, 250  $\mu$ M aminooxyacetate, 1 mM N-acetyl-cysteine, 10  $\mu$ M 3-deazaadenosine, 2 mM cycloleucine, 0.1-10  $\mu$ M decitabine, 100  $\mu$ M RG108, 25  $\mu$ M SGI1027, 10  $\mu$ M EGCG, 5  $\mu$ M Compound C, 25 nM Torin. Inhibitor or vehicle in fresh media was administered at day 0 and replenished every 3 days except in the case of decitabine, which was replenished daily due to stability issues. For testing serine dependence, ductal cells were cultured in MEM-based ductal media, with or without 0.4 mM L-serine supplementation. For glucose restriction studies, ductal cells were cultured in modified ductal media based on DMEM without glucose, glutamine or pyruvate. For assessing the ability of metabolites to rescue shPSAT1-induced growth inhibition, duct-media was supplemented with 100  $\mu$ M S-adenosyl-methionine, 1 mM betaine, 1 mM

dimethylglycine, or 1 mM nucleoside mixture (1 mM each of adenosine, guanosine, thymidine, cytidine and uridine). Soft agar assays were performed as previously described<sup>6</sup>. For IC50 determination, cells were treated with 0.0015-30  $\mu$ M decitabine or 0.076-500 nM Torin for 4 days. Apoptosis was measured using the Caspase-Glo 3/7 Assay kit according to the manufacturer's instructions.

### **Metabolic measurements**

For ATP measurements, cells were plated at a density of 10,000 cells per well in white 96-well plates at 3-4 replicates per condition, and allowed to attach overnight. Media were changed next day and ATP was measured 24 hrs later using the CellTiter Glo kit according to the manufacturer's instructions. Luminescence was normalized to number of cells as measured by DNA content using CyQuant NF. Lactate was measured using the Lactate Colorimetric/Fluorimetric Assay Kit according to the manufacturer's instructions. Fluorescence was normalized to number of cells as measured by DNA content using CyQuant NF. For glucose uptake, 400,000 cells were treated with 100  $\mu$ M 2-(N-(7-Nitrobenz-2-oxa-1,3-diazol-4-yl)Amino)-2-Deoxyglucose (2NBDG) for 30 min. Cells were then trypsinized and single-cell suspensions were analyzed by flow cytometry. Due to differences in endogenous fluorescence between genotypes under the conditions of the experiment, 2NBDG mediated fluorescence was normalized to that of unlabeled cells. S-adenosyl-methionine levels were measured using the Bridge-IT SAM Fluorescence kit according to the manufacturer's instructions. For reactive oxygen species analysis, cells were plated at a density of 10,000 cells per well in black 96-well plates at 3-4 replicates per condition, and allowed to attach overnight. Media were changed next day and ROS levels were measured 24 hrs later using DCFDA or CellROX staining according to the manufacturer's instructions. Oxygen consumption rates were measured in an XF24 Analyzer (Seahorse). In brief, cells were plated in 96-well Seahorse plates at a density of

40,000 cells per well in duct media and were allowed to attach overnight. Media was replenished one hour prior to assay time. The sequential ports of the Seahorse cartridge were loaded with the following: port A, oligomycin, port B, 2-2-[4-(trifluoromethoxy) phenyl]hydrazinylidene]-propanedinitrile (FCCP), port C, antimycin A, each diluted in media. The final concentration of the inhibitors was 4  $\mu$ M. Oxygen consumption rates were monitored in real time after injection using the XFe Analyzer (Seahorse). For normalization, equal numbers of cells were plated in black 96-well plates and cell numbers were assessed by CyQuant NF.

### Quantitative RT-PCR

Total cellular RNA was extracted using RNeasy Mini Kit (Qiagen). Genomic DNA decontamination and reverse transcription were performed in two steps from 1  $\mu$ g of total RNA using the QuantiTect Reverse Transcription Kit (Qiagen, #205310) according to the manufacturer's instructions. To test the effectiveness of the gDNA decontamination step, no-reverse-transcriptase control samples were included. Quantitative RT-PCR was performed with FastStart Universal SYBR Green (Roche) in a Lightcycler 480 (Roche). PCR reactions were performed in triplicate and the relative amount of cDNA was calculated by the comparative CT method using the 18S ribosomal RNA sequences as a control. Primer sequences:

|              |                      |
|--------------|----------------------|
| MMU-PSAT1-F  | TTAGCACCATGGAAGCCACC |
| MMU-PSAT1-R  | TGCCGAGTCCTCTGTAGTCT |
| MMU-DNMT1-F  | GTCGGACAGTGACACCCTTT |
| MMU-DNMT1-R  | TTCGTGAAGTGAGCCGTGAT |
| MMU-DNMT3A-F | GTCATGGGAGGTTCCCTGTG |

|               |                      |
|---------------|----------------------|
| MMU-DNMT3A-R  | ATTAGCACCAGCTTGGGACC |
| MMU-PSPH-F    | AACTGGTTCTCCCGTCATCG |
| MMU-PSPH-R    | CTCTTAAAAGCGCCGAACCG |
| MMU-PGK1_F    | TACCTTGCCTGTTGACTT   |
| MMU-PGK1_R    | TGTCTCCACCACCTATGA   |
| MMU-HK2_F     | CCAGCTGTTTGACCACATT  |
| MMU-HK2_R     | TCATTCACCACAGCCACA   |
| MMU-PDK1-F    | ATCCGTACAGCTGGTGCAAA |
| MMU-PDK1-R    | ACCCCGAAGCTCTCCTTGTA |
| MMU-LDHA-F    | TGCACTAGCGGTCTCAAAGA |
| MMU-LDHA-R    | TCCATGACGTCAACAAGGGC |
| MMU-GLDC-F    | GTGCAAGAGGGTATGTGGCT |
| MMU-GLDC-R    | GACATGGTAGGGGCGTGAAA |
| MMU-SHMT1-F   | GGAACAGACGTTTACGGCCA |
| MMU-SHMT1-R   | GTCTGCCATTGCACTGGTTC |
| MMU-SHMT2-F   | ACCCCGGTACTACACCGATA |
| MMU-SHMT2-R   | AGACCAGCTGACCACATCTC |
| HSA-PSAT1-F   | CAGTTCAGTGCTGTCCCCTT |
| HSA-PSAT1-R   | CCAAGCTCCTGTCACCACAT |
| MMU-LINE1-1-F | GTTCCGGGACTCCGACAAAA |
| MMU-LINE1-1-R | AAAAGGGTGCTGCCTCAGAA |
| MMU-LINE1-2-F | TCTGGGGTGAGCTAGAACCT |
| MMU-LINE1-2-R | AGAAGCTCTGTGGCTCTTGC |

|       |                      |
|-------|----------------------|
| 18S-F | GTAACCCGTTGAACCCATT  |
| 18S-R | CCATCCAATCGGTAGTAGCG |

### **SDS-PAGE analysis**

Cells were lysed in ice-cold lysis buffer (150 mM NaCl, 20 mM Tris (pH 7.5), 1 mM EDTA, 1 mM EGTA, 1% Triton X-100, 1% sodium deoxycholate, one tablet of EDTA-free protease inhibitors [Roche] per 10 ml). Samples were clarified by centrifugation and protein content measured using BCA protein assay kit (Thermo Scientific). 10 µg protein was resolved on 8-15% SDS-PAGE gels and transferred onto PVDF membranes (GE Healthcare Life Sciences, Pittsburgh, PA). Membranes were blocked in Tris-buffered saline (TBS) containing 5% non-fat dry milk and 0.1% Tween 20 (TBS-T), prior to incubation with primary antibody overnight at 4°C. The membranes were then washed with TBS-T followed by exposure to the appropriate horseradish peroxidase-conjugated secondary antibody for 45 min and visualized on Kodak X-ray film using the enhanced chemiluminescence (ECL) detection system (Thermo Scientific).

### **Methylated DNA immunoprecipitation (meDIP-PCR)**

5-methylcytosine-enriched DNA was purified using the MeDIP assay kit (Active Motif) according to the manufacturer's instructions. The recovered methylated DNA was quantified by real-time PCR using input DNA for normalization. The primers used for the PCR step are as follows:

|               |                      |
|---------------|----------------------|
| MMU-LINE1-1-F | GTTCCGGGACTCCGACAAAA |
| MMU-LINE1-1-R | AAAAGGGTGCTGCCTCAGAA |
| MMU-LINE1-2-F | TCTGGGGTGAGCTAGAACCT |
| MMU-LINE1-2-R | AGAAGCTCTGTGGCTCTTGC |



|       |                      |
|-------|----------------------|
| 18S-F | GTAACCCGTTGAACCCATT  |
| 18S-R | CCATCCAATCGGTAGTAGCG |

### **Xenograft studies**

For subcutaneous xenografts,  $5 \times 10^5$  cells were suspended in a 1:1 mixture of media:matrigel, and injected subcutaneously into the lower flank of NOD.CB17-Prkdcscid/J mice (6-10 weeks of age) (purchased from Jackson Laboratories, strain #001303). Tumor size was assessed at indicated time points by caliper measurements of length and width and the volume was calculated according to the formula (length  $\times$  width<sup>2</sup>/2). For the decitabine treatment studies, tumours were allowed to grow to  $\sim 125$  mm<sup>3</sup>, then mice were randomized into two groups and each group treated intraperitoneally with either decitabine (1 mg/kg in PBS) or vehicle (PBS) three times per week until mice in the vehicle-treated group had to be sacrificed. No mice were excluded from the analysis. For the shDNMT studies, tumors were allowed to grow to  $\sim 50$  mm<sup>3</sup>, then mice were randomized into two groups and doxycycline (200 mg/L) added to the water of one of the groups. Water was changed every 3 days. For volume-measurement-experiments were designed to detect a 50% change in tumor size with 80% power and a type I error of 5% using the T-test. All experiments were conducted under protocol 2005N000148 approved by the Subcommittee on Research Animal Care at Massachusetts General Hospital and no tumours exceeded the size allowed by it. Mice were housed in pathogen-free animal facilities. Both male and female animals were used for these experiments.

### **Statistics**

In all cases, results are expressed as mean  $\pm$  standard deviation, unless otherwise specified. Significance was analyzed using 2-tailed Student's *t* test, except in the case of Extended Data Figure 8l and m in which the  $\chi^2$  test was used. Equal variance was assumed and the assumption was not contradicted by the data. A *p* value of less than 0.05 was considered statistically significant. No samples or animals were excluded from analysis and sample size estimates were only used in xenograft experiments (see section Xenograft studies). Histology evaluation was done on a blind fashion. Tumour size measurements were not blinded.

### **Dot blot analysis**

Genomic DNA was isolated with the Blood and Tissue DNA isolation kit (Qiagen) and sheared by passing 20 times through a 28G1/2 U-100 Insulin Syringe (Becton Dickinson). Two-fold serial dilutions of the prepared DNA were prepared in TE and they denatured in 0.4 M NaOH/10 mM EDTA at 95 °C for 10 min, followed by neutralization with an equal volume of cold 2M ammonium acetate (pH 7.0). Denatured DNA samples were spotted on a nitrocellulose membrane using an assembled Bio-Dot apparatus (Bio-Rad) or a PR648 Slot blot manifold (GE Healthcare Life Sciences) according to the manufacturers' instructions. The membrane was washed with 2  $\times$  SSC buffer and DNA was ultraviolet-crosslinked for 10 min. Then the membrane was blocked with 5% non-fat milk for 1 h and incubated with anti-5mC antibody overnight. Detection was carried out with HRP-conjugated secondary antibodies and enhanced chemiluminescence reagents (Thermo Scientific). The membrane was subsequently stained with methylene blue to confirm corresponding amounts of DNA for each sample. Densitometry was performed using ImageJ (NIH).

### **Expression and hairpin constructs**

Full length wild type or kinase dead (K78I)<sup>7</sup> LKB1/STK11 protein was expressed from a pMSCV vector (blastocidin resistance). Human PSAT1 that is not targeted by hairpins against mouse PSAT1 was obtained from Harvard PlasmidID Database (HsCD00414859). shRNAs were obtained from The Molecular Profiling Laboratory (MPL) at Massachusetts General Hospital Cancer Center in partnership with the RNAi Consortium and have the following IDs: mouse PSAT1 TRCN0000346654 (CCATCAGTCCTTGACTACAAA), TRCN0000346659 (ACACTCGGTATTGTTGGAGAT), human PSAT1 TRCN0000035265 (CCAGACAACTATAAGGTGATT), TRCN0000035266 (GCACTCAGTGTTGTTAGAGAT), mouse AMPKa1 TRCN0000220674 (CGTAGTATTGATGATGAGATT), mouse AMPKa2 TRCN0000220717 (CGCCAGTCTTATCACTGCTTT), mouse DNMT1 TRCN0000039024 (GCTGACACTAAGCTGTTTGTA), TRCN0000039027 (CCCGAAGATCAACTCACAAA) and mouse DNMT3A TRCN0000231273 (CTGCTACATGTGCGGGCATAA) and TRCN0000231275 (ACCACCAGGTCAAACCTCTATA). A hairpin against GFP was used as control. Tet-inducible vectors expressing the DNMT1 and DNMT3A hairpins were obtained by annealing oligos corresponding to the constitutive hairpins and cloning them in the Age I/EcoRI site of the pLKO.1 tet-on vector as previously described<sup>8</sup>.

### **Immunofluorescence and Immunohistochemistry**

Cells were plated on poly-D-lysine/laminin coated 8-well culture slides (354688, BD Biosciences) at 40,000 cells/well. 12-16 hours later, the slides were rinsed with PBS once and fixed for 15 min with 4% paraformaldehyde at RT or for 5 min with -20 °C methanol. The slides were rinsed twice with PBS and cells were permeabilized with 0.05% Triton X-100 for 2 min or with 4N HCl for 5min staining. HCl treated cells were

neutralized with 100 mM Tris-HCl pH 8.5 for 10 min in RT. After washing twice with PBS, the slides were incubated with primary antibody in 5% normal goat serum for 1hr at room temperature, rinsed four times with PBS, and incubated with secondary antibody produced in goat (diluted 1:400 in 5% normal goat serum) for 45 min at room temperature in the dark. Slides were mounted on glass slides using Vectashield (See Materials section) and imaged on Nikon ECLIPSE Ni microscope. Tissue samples were fixed overnight in 4% buffered formaldehyde, and then embedded in paraffin and sectioned (5  $\mu$ m thickness) by the DF/HCC Research Pathology Core. Haematoxylin and eosin staining was performed using standard methods and stained slides were photographed with an Olympus DP72 microscope. For fluorescent immunohistochemistry, unstained slides were baked at 55 °C, deparaffinized in xylene (two treatments, 6 min each), rehydrated sequentially in ethanol (5 min in 100%, 3 min in 95%, 3 min in 75%, and 3 min 40%), and washed for 5 min in 0.3% Triton X-100/PBS (PBST) and 3 min in water. Endogenous peroxidase activity was blocked by incubating deparaffinized tissue sections with 3% Hydrogen Peroxide (20 min; Fisher Scientific), rinsed twice with water (3 min) and antigen retrieval was performed by boiling in 10 mM sodium citrate buffer (20 min, 95°C, pH 6). Sections were blocked 1 hour in TBS-0.05 % Tween 20-10% Normal Goat Serum (5425, Cell Signaling), and incubated overnight at 4°C with primary antibody. Primary antibodies were diluted in blocking solution as follows: PCNA (1:10,000), Cleaved Caspase 3 (1:150), CK19 (1:50). Specimens were then washed three times for 3 min each in PBST and incubated with fluorescent secondary antibodies produced in goat (diluted 1:400 in 5% normal goat serum) for 45 min at room temperature in the dark. Slides were mounted on glass slides using Vectashield (Vector Laboratories) and imaged on a Nikon ECLIPSE Ni microscope. For PCNA staining, fluorescent signal was amplified using the Tyramide Signal Amplification kit (Perkin Elmer) according to the manufacturer's instructions. Images were processed

using ImageJ software. For quantification of proliferation in tumor slides only the epithelial compartment was considered (CK19 positive). 4-6 fields containing 700-1500 cells per field from 4 different tumors in each case were analyzed. For quantitation of cleaved caspase 3 staining, 3-5 fields containing 500-1500 cells per field from 4 different tumours were analyzed. Apoptotic levels were calculated as the ratio of cleaved caspase 3 intensity to DAPI. For 5mC immunofluorescence staining deparafinized TMA slides were permeabilized with 4 N HCl for 1hr at 37°C followed by neutralization with 100mM Tris-HCl pH 8.5 for 10min at RT. Washes, primary and secondary antibody were applied as described above). Slides were mounted using Vectashield without DAPI. For 5mC immunofluorescence 77-889 cells per condition were analyzed. Image analysis was performed using ImageJ (NIH).

### **Gene Expression Profiling**

RNA-sequencing was performed using total RNA isolated in duplicates from 2 independent cell lines from K or KL genotypes or from the two independent KL lines transduced with full length LKB1 cDNA (rescue). RNAseq library-preparation and sequencing were performed by the Tufts University Genomics Core Facility. Data was processed using a standard RNA-seq pipeline that used Tophat2<sup>9</sup> to align the reads to mm9, and the Cufflinks suite<sup>10</sup> to calculate differential expression. Gene Set Enrichment Analysis (GSEA) (<http://www.broadinstitute.org/gsea/index.jsp>) of the expression data was used to assess enrichment of the KEGG as well as the SGOc geneset<sup>11-13</sup>. In all cases, pairwise GSEA was performed by creating ranked lists of genes using the log2 ratio of K to KL or KL to rescue and p-values were obtained by permuting the gene set (1000 permutations). Raw sequencing files can be found under the Superseries record GSE86145 (<http://www.ncbi.nlm.nih.gov/geo/query/acc.cgi?acc=GSE86145>).

### **<sup>13</sup>C-Glucose and <sup>15</sup>N-Glutamine tracing**

Cells were plated in 10 cm plates at a density of 10<sup>6</sup> cells/plate and allowed to attach overnight. Next day, they were washed with PBS to remove traces of unlabeled metabolites, then overlaid with ductal media based on DMEM without glucose, pyruvate or glutamine, supplemented with 25 mM regular of <sup>13</sup>C-glucose, 2 mM regular or <sup>15</sup>N-glutamine and 2 mM pyruvate. At the indicated time points, cells were washed three times with ice cold 0.9% NaCl, then collected by scraping in 50% methanol. After 30 sec vortexing, samples were pelleted and the clarified supernatant was transferred to a new tube. Protein was removed by chloroform extraction. The purified aqueous phase was dried under vacuum. Dessicated metabolites were derivatized as previously described<sup>14</sup>. In brief, samples were dissolved in 30 µl of 2% methoxyamine hydrochloride in pyridine (MOX, Pierce) and incubated at 37°C for 1.5 hrs. Further derivatization was achieved by addition of 45 µl of *N*-Methyl-*N*-*tert*-butyldimethylsilyltrifluoroacetamide (MTBSTFA + 1% TBDMSCI, 375934 Sigma) followed by vigorous mixing and incubation at 55°C for 1 hr. Samples were then pulse spun to remove insoluble material. Clarified solutions were transferred to inserts set in brown glass vials and capped prior to being loaded onto the column. Analysis was performed on an Agilent 6890 GC instrument. Samples were loaded onto a 30 m DB-35MS capillary column using helium as the carrier gas that was interfaced to an Agilent 5975B MS. Electron impact (EI) ionization was set at 70 eV. Each sample was injected at 270°C at a flow rate of 1 ml/min. To mobilize metabolites, the GC oven temperature was held at 100°C for 3 min and increased to 300°C at 3.5°C/min for a total run time of approximately 1 hr. For intracellular metabolites, 1 µl of each sample was injected in splitless mode. All analyses were operated in full scan mode while recording a mass to charge ratio ( $\Delta m/z$ ) spectra in the range of 100-650 m/z. Specific metabolite  $\Delta m/z$  analyzed are available upon request. Fractional enrichments of <sup>13</sup>C and <sup>15</sup>N labeled metabolites have been corrected for the

natural abundance of  $^{13}\text{C}$  and  $^{15}\text{N}$  using METRAN<sup>15-18</sup> and in house scripts written in Matlab. In-house scripts are available upon request. For LC-MS analysis, cells were plated at a density of 500K cells/plate and allowed to attach overnight. Next morning, they were washed with PBS to remove traces of unlabeled metabolites, then overlaid with ductal media based on DMEM without glucose, pyruvate or glutamine, supplemented with 25 mM regular of  $^{13}\text{C}$ -glucose, 2 mM regular or  $^{15}\text{N}$ -glutamine and 2 mM pyruvate. At the indicated time points, cells were washed three times with ice cold 0.9% NaCl, then collected by scraping in methanol:acetonitrile:water (40:40:20) and cells were lysed by three freeze and thaw cycles (dry-ice bath and room temperature). After 30sec vortexing, samples were pelleted and the clarified supernatant was transferred to a new tube. Fifty microliters of the cleared extract were transferred to inserts set in brown glass vials and capped prior to being loaded onto the column. Samples were loaded by autosampler (FAMOS+) on a capillary (75  $\mu\text{m}$ ) 12cm ProntoSil C18 (3  $\mu\text{m}$ , 200 Å, Bischoff) column that was interfaced with a Thermo Exactive MS. Metabolites were eluted applying a gradient of 3%-100% MeOH with tributylamine for ion pairing over 40 min at a flow rate of 150  $\mu\text{l}/\text{min}$  using an Agilent 1260 infinity pump. The nanospray ionization source (NSI) spray was set to 1.8 kV, spray current at 2.1  $\mu\text{A}$ , capillary voltage at -52.5V, tube lens voltage at -150V, simmer voltage at -42 V and capillary temperature was set to 300°C. The scanner acquired full MS spectrum (80-1000 m/z range; ultra-high resolution, R=100000 at 1 Hz; maximum injection time 100 ms). Raw data were transformed using MSConvert<sup>19</sup> and analyzed by MAVEN<sup>20</sup>.

### **Multiplexed mass spectrometry-based quantitative proteomics**

**Protein Digestion and TMT Labeling.** Proteomes were subjected to multiplexed quantitative proteomics analysis using tandem-mass tag (TMT) reagents on an Orbitrap Fusion mass spectrometer (Thermo Scientific). Disulfide bonds were reduced with

dithiothreitol (DTT) and free thiols alkylated with iodoacetamide (IAA) as described previously<sup>21</sup>. Reduced and alkylated proteins were then precipitated with trichloroacetic acid (TCA). Precipitated proteins were reconstituted in 300  $\mu$ L of 1M urea in 50mM HEPES, pH 8.5 and digested first with endoproteinase Lys-C (Wako) for 17 hours at room temperature (RT) and then with sequencing-grade trypsin (Promega) for 6 hours at 37°C. The digest was acidified with trifluoroacetic acid (TFA). Peptides were desalted over Sep-Pak C<sub>18</sub> solid-phase extraction (SPE) cartridges (Waters). The concentration of the desalted peptide solutions was measured with a BCA assay (Thermo Scientific) and a maximum of 50  $\mu$ g of peptides were aliquoted, then were dried under vacuum and stored at -80°C until they were labeled with TMT reagents. Peptides were labeled with 10-plex tandem mass tag (TMT) reagents (Thermo Scientific). TMT reagents were suspended in dry acetonitrile (ACN) at a concentration of 20  $\mu$ g/ $\mu$ L. Dried peptides (50  $\mu$ g) were re-suspended in 30% ACN in 200mM HEPES, pH 8.5 and 7.5  $\mu$ L of the appropriate TMT reagent was added to the sample, which was incubated at RT for one hour. The reaction was then quenched by adding 6  $\mu$ L of 5% (w/v) hydroxylamine in 200 mM HEPES (pH 8.5) and incubation for 15 min at RT. The solutions were acidified by adding 50  $\mu$ L of 1% TFA.

#### **Basic pH Reversed-Phase Liquid Chromatography (bRPLC) Sample Fractionation.**

Sample fractionation was performed by basic pH reversed-phase liquid chromatography (bRPLC) with concatenated fraction combining<sup>22,23</sup>. Briefly, samples were re-suspended in 5% formic acid (FA)/5% ACN and separated over a 4.6 mm x 250 mm ZORBAX Extend C<sub>18</sub> column (5  $\mu$ m, 80 Å, Agilent Technologies) on an Agilent 1260 HPLC system outfitted with a fraction collector, degasser and variable wavelength detector. The separation was performed applying a gradient build from 22 to 35% ACN in 10 mM ammonium bicarbonate in 60 min at a flow-rate of 0.5 mL/minute. A total of 96 fractions were collected, which were combined in a total of 12 fractions. The combined fractions



were dried under vacuum, re-constituted with 8  $\mu$ l of 5% FA/5% ACN, 3  $\mu$ l of which were analyzed by LC-MS2/MS3 for identification and quantification.

**Liquid Chromatography Mass Spectrometry.** All LC-MS2/MS3 experiments were analyzed by microcapillary liquid chromatography tandem mass spectrometry on an Orbitrap Fusion mass spectrometer and using a recently introduced multistage (MS3) method to provide highly accurate quantification<sup>21,24</sup>. The mass spectrometer was equipped with an EASY-nLC 1000 integrated autosampler and HPLC pump system. Peptides were separated over a 100  $\mu$ m inner diameter microcapillary column in-house packed with first 0.5 cm of Magic C4 resin (5  $\mu$ m, 100Å, Michrom Bioresources), then with 0.5 cm of Maccel C<sub>18</sub> resin (3  $\mu$ m, 200 Å, Nest Group) and 29 cm of GP-C18 resin (1.8  $\mu$ m, 120 Å, Sepax Technologies). Peptides were eluted applying a gradient of 8-27% ACN in 0.125% formic acid over 165 min at a flow rate of 300 nl/min. To identify and quantify the TMT-labeled peptides we applied a synchronous precursor selection MS3 method<sup>21,24,25</sup> in a data dependent mode. The scan sequence was started with the acquisition of a full MS or MS1 one spectrum acquired in the Orbitrap (m/z range, 500-1200; resolution, 60,000; AGC target,  $5 \times 10^5$ ; maximum injection time, 100 ms), and the ten most intense peptide ions from detected in the full MS spectrum were then subjected to MS2 and MS3 analysis, while the acquisition time was optimized in an automated fashion (Top Speed, 5 sec). MS2 scans were done in the linear ion trap using the following settings: quadrupole isolation at an isolation width of 0.5Th; fragmentation method, CID; AGC target,  $1 \times 10^4$ ; maximum injection time, 35 ms; normalized collision energy, 30%). Using synchronous precursor selection the 10 most abundant fragment ions were selected for the MS3 experiment following each MS2 scan. The fragment ions were further fragmented using the HCD fragmentation (normalized collision energy, 50%) and the MS3 spectrum was acquired in the Orbitrap (resolution, 60,000; AGC target,  $5 \times 10^4$ ; maximum injection time, 250ms).

Data analysis was performed on an in-house generated SEQUEST-based<sup>26</sup> software platform. RAW files were converted into the mzXML format using a modified version of ReAdW.exe. MS2 spectra were searched against a protein sequence database containing all protein sequences in the human UniProt database (downloaded 02/04/2014) as well as that of known contaminants such as porcine trypsin. This target component of the database was followed by a decoy component containing the same protein sequences but in flipped (or reversed) order<sup>27</sup>. MS2 spectra were matched against peptide sequences with both termini consistent with trypsin specificity and allowing two missed trypsin cleavages. The precursor ion m/z tolerance was set to 50 ppm, TMT tags on the N-terminus and on lysine residues (229.162932Da) as well as carbamidomethylation (57.021464Da) on cysteine residues were set as static modification, and oxidation (15.994915Da) of methionines as variable modification. Using the target-decoy database search strategy<sup>27</sup> a spectra assignment false discovery rate of less than 1% was achieved through using linear discriminant analysis with a single discriminant score calculated from the following SEQUEST search score and peptide sequence properties: mass deviation, XCorr, dCn, number of missed trypsin cleavages, and peptide length<sup>28</sup>. The probability of a peptide assignment to be correct was calculated using a posterior error histogram and the probabilities for all peptides assigned to a protein were combined to filter the data set for a protein FDR of less than 1%. Peptides with sequences that were contained in more than one protein sequence from the UniProt database were assigned to the protein with most matching peptides<sup>28</sup>. TMT reporter ion intensities were extracted as that of the most intense ion within a 0.03Th window around the predicted reporter ion intensities in the collected MS3 spectra. Only MS3 with an average signal-to-noise value of larger than 28 per reporter ion as well as with an isolation specificity<sup>21</sup> of larger than 0.75 were considered for quantification. Reporter ions from all peptides assigned to a protein were summed to

define the protein intensity. A two-step normalization of the protein TMT-intensities was performed by first normalizing the protein intensities over all acquired TMT channels for each protein based to the median average protein intensity calculated for all proteins. To correct for slight mixing errors of the peptide mixture from each sample a median of the normalized intensities was calculated from all protein intensities in each TMT channel and the protein intensities were normalized to the median value of these median intensities.

### **Whole Genome Bisulfite Sequencing (WGBS), processing and analysis**

WGBS libraries were constructed as follows: 200 ng of genomic DNA was fragmented using a Covaris S2 for 6 min according to the following program: duty cycle 5%; intensity 5; cycle per burst 200. The sheared DNA was purified using the DNA Clean & Concentrator kit from Zymo Research and bisulfite conversion of purified DNA was then conducted using the EZ DNA Methylation-Gold kit (Zymo Research) per the manufacturer's instructions, eluting to 15 µl low TE buffer. To minimize degradation during storage, the converted DNA was immediately processed to generate the WGBS libraries using the Accel-NGS Methyl-Seq DNA library kit (Swift Biosciences) following the standard protocol. The libraries were sequenced for 100-bp paired-end reads on an Illumina HiSeq 2500 sequencer, as previously described<sup>29</sup>. WGBS raw sequencing reads were aligned to mm9 build of the mouse genome using BSMAP<sup>30</sup>. DNA methylation calling for individual CpG sites was performed using mcall from the MOABS package<sup>31</sup>. Calculation of the average methylation of individual features and identification of differentially methylated features was done as previously described<sup>32</sup>. Briefly, average methylation for a feature was calculated as the coverage-weighted average across replicates of methylation at each CpG within the feature. Differentially methylated tiles were identified using a coverage-weighted two-sample t-test with CpG

methylation levels within the tile as samples. Only CpGs with 5x coverage and features with at least 2CpGs satisfying this coverage threshold were used in the analysis. Feature definitions were downloaded from ENSEMBL for promoters, exons and introns and from UCSC for islands, shores, LINEs, SINEs, LTRs, satellites and microsatellites. Intersection between bed files was calculated using intersectBed from the Bedtools package<sup>33</sup>. Hierarchical clustering was done using the hclust function in R, with Euclidean distance as the distance metric. For all analyses, methylation at sex chromosomes was discarded. Bisulfite conversion rates and sequencing statistics can be found in Supplementary Data Table 3. Raw sequencing files can be found under the Superseries record GSE86145 (<http://www.ncbi.nlm.nih.gov/geo/query/acc.cgi?acc=GSE86145>).

### **Generation of the list of SAM-dependent enzymes**

The list of transferases (Class 2 enzymes) was downloaded from ExplorEnz (<http://www.enzyme-database.org>). This list was hand-curated for mammalian genes and the 183 genes collected are considered the complete class of SAM-utilizing enzymes.

## Supplementary References

1. Jackson, E. L. *et al.* Analysis of lung tumor initiation and progression using conditional expression of oncogenic K-ras. *Genes Dev.* **15**, 3243–3248 (2001).
2. Bardeesy, N. *et al.* Loss of the Lkb1 tumour suppressor provokes intestinal polyposis but resistance to transformation. *Nature* **419**, 162–167 (2002).
3. Kopp, J. L. *et al.* Sox9<sup>+</sup> ductal cells are multipotent progenitors throughout development but do not produce new endocrine cells in the normal or injured adult pancreas. *Development* **138**, 653–665 (2011).
4. Agbunag, C., Lee, K. E., Buontempo, S. & Bar-Sagi, D. Pancreatic duct epithelial cell isolation and cultivation in two-dimensional and three-dimensional culture systems. *Meth. Enzymol.* **407**, 703–710 (2006).
5. Bardeesy, N. *et al.* Both p16(Ink4a) and the p19(Arf)-p53 pathway constrain progression of pancreatic adenocarcinoma in the mouse. *Proc. Natl. Acad. Sci. U.S.A.* **103**, 5947–5952 (2006).
6. Kottakis, F. *et al.* FGF-2 Regulates Cell Proliferation, Migration, and Angiogenesis through an NDY1/KDM2B-miR-101-EZH2 Pathway. *Mol. Cell* **43**, 285–298 (2011).
7. Ji, H. *et al.* LKB1 modulates lung cancer differentiation and metastasis. *Nature* **448**, 807–810 (2007).
8. Wiederschain, D. *et al.* Single-vector inducible lentiviral RNAi system for oncology target validation. *Cell Cycle* **8**, 498–504 (2009).
9. Kim, D. *et al.* TopHat2: accurate alignment of transcriptomes in the presence of insertions, deletions and gene fusions. *Genome Biol* **14**, R36 (2013).
10. Trapnell, C. *et al.* Transcript assembly and quantification by RNA-Seq reveals unannotated transcripts and isoform switching during cell differentiation. *Nat. Biotechnol.* **28**, 511–515 (2010).
11. Subramanian, A. *et al.* Gene set enrichment analysis: a knowledge-based

- approach for interpreting genome-wide expression profiles. *Proc. Natl. Acad. Sci. U.S.A.* **102**, 15545–15550 (2005).
12. Mootha, V. K. *et al.* PGC-1alpha-responsive genes involved in oxidative phosphorylation are coordinately downregulated in human diabetes. *Nat. Genet.* **34**, 267–273 (2003).
  13. Mehrmohamadi, M., Liu, X., Shestov, A. A. & Locasale, J. W. Characterization of the usage of the serine metabolic network in human cancer. *Cell Rep* **9**, 1507–1519 (2014).
  14. Nicolay, B. N. *et al.* Loss of RBF1 changes glutamine catabolism. *Genes Dev.* **27**, 182–196 (2013).
  15. Antoniewicz, M. R., Kelleher, J. K. & Stephanopoulos, G. Determination of confidence intervals of metabolic fluxes estimated from stable isotope measurements. *Metab Eng* **8**, 324–337 (2006).
  16. Antoniewicz, M. R., Kelleher, J. K. & Stephanopoulos, G. Elementary metabolite units (EMU): a novel framework for modeling isotopic distributions. *Metab Eng* **9**, 68–86 (2007).
  17. Young, J. D., Walther, J. L., Antoniewicz, M. R., Yoo, H. & Stephanopoulos, G. An elementary metabolite unit (EMU) based method of isotopically nonstationary flux analysis. *Biotechnol Bioeng* **99**, 686–699 (2008).
  18. Yoo, H., Antoniewicz, M. R., Stephanopoulos, G. & Kelleher, J. K. Quantifying reductive carboxylation flux of glutamine to lipid in a brown adipocyte cell line. *J. Biol. Chem.* **283**, 20621–20627 (2008).
  19. Chambers, M. C. *et al.* A cross-platform toolkit for mass spectrometry and proteomics. *Nat. Biotechnol.* **30**, 918–920 (2012).
  20. Clasquin, M. F., Melamud, E. & Rabinowitz, J. D. LC-MS data processing with MAVEN: a metabolomic analysis and visualization engine. *Curr Protoc*

*Bioinformatics* **Chapter 14**, Unit14.11–14.11.23 (2012).

21. Ting, L., Rad, R., Gygi, S. P. & Haas, W. MS3 eliminates ratio distortion in isobaric multiplexed quantitative proteomics. *Nat. Methods* **8**, 937–940 (2011).
22. Wang, Y. *et al.* Reversed-phase chromatography with multiple fraction concatenation strategy for proteome profiling of human MCF10A cells. *Proteomics* **11**, 2019–2026 (2011).
23. Tolonen, A. C. & Haas, W. Quantitative proteomics using reductive dimethylation for stable isotope labeling. *J Vis Exp* – (2014). doi:10.3791/51416
24. McAlister, G. C. *et al.* MultiNotch MS3 enables accurate, sensitive, and multiplexed detection of differential expression across cancer cell line proteomes. *Anal Chem* **86**, 7150–7158 (2014).
25. Weekes, M. P. *et al.* Quantitative temporal viromics: an approach to investigate host-pathogen interaction. *Cell* **157**, 1460–1472 (2014).
26. Eng, J. K., McCormack, A. L. & Yates, J. R. An approach to correlate tandem mass spectral data of peptides with amino acid sequences in a protein database. *J. Am. Soc. Mass Spectrom.* **5**, 976–989 (1994).
27. Elias, J. E. & Gygi, S. P. Target-decoy search strategy for increased confidence in large-scale protein identifications by mass spectrometry. *Nat. Methods* **4**, 207–214 (2007).
28. Huttlin, E. L. *et al.* A tissue-specific atlas of mouse protein phosphorylation and expression. *Cell* **143**, 1174–1189 (2010).
29. Gifford, C. A. *et al.* Transcriptional and epigenetic dynamics during specification of human embryonic stem cells. *Cell* **153**, 1149–1163 (2013).
30. Xi, Y. & 0036, W. L. BSMAP: whole genome bisulfite sequence MAPping program. *BMC Bioinformatics* **10**, 232 (2009).
31. Sun, D. *et al.* MOABS: model based analysis of bisulfite sequencing data.

*Genome Biol* **15**, R38 (2014).

32. Liao, J. *et al.* Targeted disruption of DNMT1, DNMT3A and DNMT3B in human embryonic stem cells. *Nat. Genet.* **47**, 469–478 (2015).
33. Quinlan, A. R. BEDTools: The Swiss-Army Tool for Genome Feature Analysis. *Curr Protoc Bioinformatics* **47**, 11.12.1–34 (2014).



Supplementary Data Table 1: Metabolic signatures (KEGG) regulated by LKB1

| Metabolic signatures (KEGG) enriched in KL vs K cells (RNA sequencing dataset) |      |            |            |            |
|--------------------------------------------------------------------------------|------|------------|------------|------------|
| NAME                                                                           | SIZE | ES         | NES        | p-val      |
| KEGG PROPANOATE METABOLISM                                                     | 31   | -0.186803  | -1.783708  | 0          |
| KEGG VALINE LEUCINE AND ISOLEUCINE DEGRADATION                                 | 40   | -0.679458  | -1.743393  | 0          |
| KEGG FATTY ACID METABOLISM                                                     | 32   | -0.694476  | -1.717043  | 0          |
| KEGG HISTIDINE METABOLISM                                                      | 28   | -0.656328  | -1.651446  | 0.00524470 |
| KEGG STARCH AND SUCROSE METABOLISM                                             | 28   | -0.646092  | -1.584697  | 0.00525396 |
| KEGG GALACTOSE METABOLISM                                                      | 24   | -0.652489  | -1.563144  | 0.01587307 |
| KEGG STERIOD BIOSYNTHESIS                                                      | 13   | -0.756542  | -1.538193  | 0.01612903 |
| KEGG PRIMARY BILE ACID BIOSYNTHESIS                                            | 15   | -0.726512  | -1.531933  | 0.03057554 |
| KEGG PORPHYRIN AND CHLOROPHYLL METABOLISM                                      | 24   | -0.660204  | -1.521155  | 0.02094241 |
| KEGG PANTOTHENATE AND COA BIOSYNTHESIS                                         | 15   | -0.718801  | -1.519244  | 0.02199662 |
| KEGG GLUTATHIONE METABOLISM                                                    | 48   | -0.557875  | -1.496732  | 0.01768489 |
| KEGG NICOTINATE AND NICOTINAMIDE METABOLISM                                    | 23   | -0.650948  | -1.490098  | 0.02298851 |
| KEGG GLYCINE SERINE AND THREONINE METABOLISM                                   | 30   | -0.597598  | -1.472211  | 0.03552398 |
| KEGG BIBOFLAVIN METABOLISM                                                     | 15   | -0.696117  | -1.456595  | 0.05714286 |
| KEGG BIOSYNTHESIS OF UNSATURATED FATTY ACIDS                                   | 19   | -0.652323  | -1.448259  | 0.04796521 |
| KEGG TERPENOID BACKBONE BIOSYNTHESIS                                           | 15   | -0.675982  | -1.446977  | 0.05791373 |
| KEGG PYRUVATE METABOLISM                                                       | 36   | -0.558971  | -1.425023  | 0.04262295 |
| KEGG METHYL METABOLISM                                                         | 27   | -0.589249  | -1.409508  | 0.0681431  |
| KEGG GLYCOLYSIS GLUCONEOGENESIS                                                | 54   | -0.507406  | -1.396497  | 0.03980999 |
| KEGG SELENOAMINO ACID METABOLISM                                               | 25   | -0.5887506 | -1.389432  | 0.08783784 |
| KEGG TRYPTOPHAN METABOLISM                                                     | 39   | -0.5403609 | -1.37325   | 0.06589786 |
| KEGG FRUCTOSE AND MANNOSE METABOLISM                                           | 33   | -0.5374658 | -1.357856  | 0.07363014 |
| KEGG BETA ALANINE METABOLISM                                                   | 22   | -0.583935  | -1.342309  | 0.09717315 |
| KEGG PURINE METABOLISM                                                         | 152  | -0.4281466 | -1.3391873 | 0.02008608 |
| KEGG LYSINE DEGRADATION                                                        | 43   | -0.5028372 | -1.3254603 | 0.07154742 |
| KEGG FOLATE BIOSYNTHESIS                                                       | 30   | -0.6930894 | -1.294517  | 0.12097097 |
| KEGG ONE CARBON POOL BY FOLATE                                                 | 17   | -0.588681  | -1.287491  | 0.14960122 |
| KEGG GLYCEROLIPID METABOLISM                                                   | 47   | -0.4739668 | -1.2788787 | 0.12086093 |

| Metabolic signatures (KEGG) enriched in KL vs rescue cells (RNA sequencing dataset) |      |            |           |            |
|-------------------------------------------------------------------------------------|------|------------|-----------|------------|
| NAME                                                                                | SIZE | ES         | NES       | p-val      |
| KEGG VALINE LEUCINE AND ISOLEUCINE DEGRADATION                                      | 40   | 0.68689193 | 1.847964  | 0          |
| KEGG PROPANOATE METABOLISM                                                          | 31   | 0.6962086  | 1.813167  | 0          |
| KEGG STARCH AND SUCROSE METABOLISM                                                  | 28   | 0.696654   | 1.787652  | 0.00217865 |
| KEGG GLYCINE SERINE AND THREONINE METABOLISM                                        | 30   | 0.67652786 | 1.748912  | 0.00220791 |
| KEGG FATTY ACID METABOLISM                                                          | 32   | 0.6303722  | 1.6344189 | 0.0194413  |
| KEGG PANTOTHENATE AND COA BIOSYNTHESIS                                              | 15   | 0.7128456  | 1.6132475 | 0.02340426 |
| KEGG PRIMARY BILE ACID BIOSYNTHESIS                                                 | 15   | 0.74161416 | 1.6063976 | 0.01008065 |
| KEGG PORPHYRIN AND CHLOROPHYLL METABOLISM                                           | 24   | 0.6552958  | 1.5944029 | 0.01687764 |
| KEGG GLUTATHIONE METABOLISM                                                         | 48   | 0.53864984 | 1.5824788 | 0.04529185 |
| KEGG NICOTINATE AND NICOTINAMIDE METABOLISM                                         | 23   | 0.63635606 | 1.5636767 | 0.01851852 |
| KEGG ARGININE AND PROLINE METABOLISM                                                | 50   | 0.5277646  | 1.5208818 | 0.01515152 |
| KEGG GLYCOLYSIS GLUCONEOGENESIS                                                     | 54   | 0.52471715 | 1.5127068 | 0.00888776 |
| KEGG TERPENOID BACKBONE BIOSYNTHESIS                                                | 15   | 0.687989   | 1.4992368 | 0.0304292  |
| KEGG PYRUVATE METABOLISM                                                            | 36   | 0.564419   | 1.4891049 | 0.02992005 |
| KEGG FRUCTOSE AND MANNOSE METABOLISM                                                | 33   | 0.55810996 | 1.4866409 | 0.01483324 |
| KEGG STERIOD BIOSYNTHESIS                                                           | 13   | 0.6916134  | 1.4703979 | 0.05263158 |
| KEGG HISTIDINE METABOLISM                                                           | 28   | 0.5746119  | 1.4504648 | 0.02453988 |
| KEGG SELENOAMINO ACID METABOLISM                                                    | 25   | 0.5881608  | 1.4353648 | 0.05991398 |
| KEGG ONE CARBON POOL BY FOLATE                                                      | 17   | 0.62294006 | 1.4341681 | 0.07188164 |
| KEGG GLYCEROLIPID METABOLISM                                                        | 47   | 0.5074729  | 1.4182684 | 0.04393305 |
| KEGG GALACTOSE METABOLISM                                                           | 24   | 0.5696987  | 1.3872246 | 0.07641921 |
| KEGG FOLATE BIOSYNTHESIS                                                            | 10   | 0.7132086  | 1.3835475 | 0.09765625 |
| KEGG BETA ALANINE METABOLISM                                                        | 22   | 0.553447   | 1.352391  | 0.08938572 |
| KEGG BIOSYNTHESIS OF UNSATURATED FATTY ACIDS                                        | 19   | 0.5832406  | 1.3466569 | 0.11201629 |
| KEGG PURINE METABOLISM                                                              | 152  | 0.39029574 | 1.3025622 | 0.02612827 |

| Metabolic signatures (KEGG) enriched in KL vs K cells (Proteomics dataset) |      |            |            |            |
|----------------------------------------------------------------------------|------|------------|------------|------------|
| NAME                                                                       | SIZE | ES         | NES        | p-val      |
| KEGG PURINE METABOLISM                                                     | 152  | -0.1125574 | -1.6301998 | 0.03721117 |
| KEGG GLYCINE SERINE AND THREONINE METABOLISM                               | 16   | -0.5559085 | -1.488742  | 0.05454546 |
| KEGG PYRIMIDINE METABOLISM                                                 | 78   | -0.36517   | -1.3819337 | 0.03322259 |
| KEGG GLYCOLYSIS GLUCONEOGENESIS                                            | 35   | -0.4160941 | -1.3632835 | 0.08156028 |

Supplementary Table 2. Curated list of S-adenosyl-methionine utilizing enzymes (RNAseq)

| gene       | K_FPKM     |            |           | KL_FPKM   |           |           |            | rescue_FPKM |           | q val (K vs KL) |
|------------|------------|------------|-----------|-----------|-----------|-----------|------------|-------------|-----------|-----------------|
|            | K-2-1      | K-1-2      | K-2-2     | KL-1-1    | KL-2-1    | KL-1-2    | KL-L-2     | rescue-1    | rescue-1  |                 |
| 6430573F11 | 0.0499595  | 0.0358787  | 0.0615988 | 0.185944  | 0.0493373 | 0.187742  | 0.0649221  | 0.0646899   | 0         | 1               |
| ALKBH8     | 6.02262    | 7.07688    | 7.8227    | 7.36679   | 7.8644    | 8.41918   | 8.94612    | 6.78247     | 6.32825   | 0.432551        |
| AS3MT      | 5.80021    | 1.7827     | 3.20182   | 4.76161   | 4.16813   | 3.93943   | 6.04377    | 2.95299     | 4.53429   | 0.278058        |
| ASH1L      | 7.95223    | 7.45242    | 8.23551   | 8.22104   | 8.52584   | 8.80987   | 8.08976    | 8.48311     | 8.41324   | 0.709296        |
| ASH2L      | 39.7535    | 39.8612    | 47.7321   | 36.6427   | 36.3149   | 42.5642   | 41.7083    | 35.7729     | 37.8811   | 0.760743        |
| ASMT       | 0          | 0          | 0         | 0         | 0         | 0         | 0          | 0           | 0.0569616 | 1               |
| B630005N14 | 18.0488    | 15.2231    | 17.0044   | 16.9307   | 17.15     | 14.2784   | 14.5945    | 14.7285     | 16.5819   | 0.78032         |
| BCCIN3D    | 5.29539    | 5.82815    | 5.43734   | 4.69844   | 5.76148   | 5.66287   | 7.97382    | 6.09074     | 5.56155   | 0.879689        |
| BHMT       | 0          | 0          | 0         | 0         | 0         | 0         | 0          | 0           | 0         | 1               |
| BHMT2      | 0          | 0          | 0         | 0         | 0         | 0         | 0          | 0           | 0         | 1               |
| CAMKMT     | 1.46392    | 0.796361   | 0.774104  | 1.82252   | 2.13638   | 1.38566   | 1.25487    | 1.56035     | 1.72981   | 0.220986        |
| CARM1      | 31.225     | 37.0963    | 33.5811   | 24.4907   | 22.0934   | 27.509    | 28.3831    | 30.7524     | 31.2672   | 0.202146        |
| COMT       | 48.676     | 49.5746    | 49.2919   | 51.9787   | 47.1639   | 41.0381   | 38.3494    | 58.1419     | 50.3948   | 0.669337        |
| COMTD1     | 6.56878    | 6.08153    | 7.11202   | 5.80925   | 5.79973   | 5.4446    | 4.64888    | 7.6248      | 7.08445   | 0.881544        |
| COQ3       | 10.3862    | 9.81913    | 10.0682   | 11.3725   | 10.1833   | 12.9472   | 14.5505    | 10.632      | 11.6907   | 0.237787        |
| COQ5       | 14.6302    | 13.9694    | 15.0903   | 15.9715   | 14.9505   | 15.0091   | 15.0978    | 14.2854     | 16.0783   | 0.835809        |
| CXXC1      | 20.0041    | 15.7396    | 15.7594   | 21.4044   | 21.81     | 18.3914   | 17.8525    | 15.6082     | 16.7736   | 0.444395        |
| DIMT1      | 4.26095    | 5.98205    | 4.7349    | 3.66751   | 4.00814   | 4.29743   | 4.82566    | 4.09071     | 4.49581   | 0.536316        |
| DNMT3B     | 0.894253   | 0.613967   | 0.389261  | 0.650853  | 0.577863  | 0.707098  | 0.597913   | 0.688951    | 0.56012   | 0.992377        |
| DNMT3L     | 0          | 0          | 0         | 0         | 0         | 0.0221452 | 0          | 0           | 0         | 1               |
| DOT1L      | 10.3004    | 10.1132    | 8.31863   | 11.2398   | 11.1052   | 11.8523   | 13.0658    | 8.65611     | 9.34968   | 0.176978        |
| DPH5       | 11.0409    | 12.2648    | 14.0387   | 11.991    | 11.0908   | 12.2951   | 14.0152    | 10.3317     | 13.9554   | 0.995984        |
| ECE2       | 16.951     | 19.29      | 14.1867   | 13.5457   | 15.1498   | 12.6371   | 14.9581    | 15.8717     | 17.9828   | 0.534979        |
| EHMT1      | 15.8335    | 16.5758    | 16.0039   | 14.9111   | 14.1132   | 15.0346   | 15.0632    | 14.1494     | 13.7078   | 0.696288        |
| EHMT2      | 45.9126    | 47.1617    | 46.0484   | 47.6262   | 44.3401   | 47.1596   | 47.5047    | 46.8096     | 44.2448   | 0.997215        |
| EMG1       | 59.1113    | 59.4921    | 68.0353   | 61.3942   | 59.0104   | 68.0575   | 81.0298    | 56.0878     | 71.9858   | 0.832992        |
| EZH1       | 11.9273    | 10.5498    | 10.8606   | 12.6709   | 12.7078   | 11.6661   | 12.1495    | 12.0208     | 10.1924   | 0.56458         |
| EZH2       | 29.3527    | 32.0834    | 35.6023   | 33.1317   | 28.9507   | 38.9901   | 39.3323    | 29.1342     | 40.1915   | 0.60116         |
| FBL        | 4.32816    | 9.59078    | 8.6406    | 4.38846   | 5.18556   | 7.99761   | 9.06127    | 6.3262      | 10.182    | 0.785438        |
| FBLL1      | 0          | 0          | 0         | 0         | 0.0503626 | 0         | 0          | 0           | 0         | 1               |
| FDXACB1    | 4.11258    | 4.95528    | 4.88641   | 3.86908   | 3.61847   | 4.5879    | 5.14867    | 4.58361     | 4.67175   | 0.842309        |
| FTSJ1      | 6.73112    | 7.21696    | 7.30663   | 7.4079    | 7.64127   | 7.86104   | 8.86397    | 6.88474     | 7.07356   | 0.590777        |
| FTSJ2      | 4.60851    | 5.83221    | 6.27336   | 5.70705   | 6.61033   | 5.63859   | 7.07902    | 6.67166     | 5.40161   | 0.753792        |
| FTSJ3      | 39.1203    | 44.2609    | 43.6933   | 36.5456   | 35.5456   | 44.4825   | 45.8651    | 43.2876     | 42.5018   | 0.905444        |
| FTSJD1     | 9.47488    | 10.3342    | 10.7962   | 9.21122   | 10.5378   | 9.56468   | 10.8006    | 9.53937     | 8.24906   | 0.939501        |
| FTSJD2     | 27.4656    | 28.4216    | 30.5178   | 30.511    | 29.6536   | 35.1598   | 27.6913    | 28.5095     | 30.2942   | 0.760934        |
| GAMT       | 4.958      | 2.82938    | 3.59813   | 8.11316   | 5.96164   | 6.70019   | 6.66375    | 3.79454     | 2.86342   | 0.847298        |
| GM17296    | 4.28367    | 2.93873    | 3.57805   | 4.05665   | 4.96808   | 3.52236   | 4.17232    | 2.88673     | 3.50289   | 0.613094        |
| GNMT       | 1.17951    | 1.22854    | 1.43049   | 1.79386   | 2.63151   | 2.26009   | 2.37908    | 1.23992     | 1.55552   | 0.186882        |
| HEMK1      | 3.26117    | 2.56248    | 2.97409   | 3.09384   | 5.88701   | 2.91322   | 4.8612     | 2.38203     | 4.87273   | 0.144108        |
| HENMT1     | 0          | 0.165209   | 0.0209623 | 0.162364  | 0.130529  | 0.134564  | 0          | 0.0660279   | 0.0936177 | 1               |
| ICMT       | 33.3428    | 35.1869    | 29.8025   | 28.3064   | 29.8728   | 31.3329   | 30.8414    | 36.1323     | 33.5983   | 0.607972        |
| INMT       | 0          | 0          | 0         | 0         | 0         | 0         | 0          | 0           | 0         | 1               |
| IRF4       | 0.00896499 | 0.00675387 | 0.0310312 | 0         | 0         | 0         | 0.00825208 | 0           | 0         | 1               |
| LCMT1      | 21.4369    | 25.4335    | 25.5532   | 29.8526   | 29.6246   | 29.8021   | 29.925     | 26.0564     | 29.2566   | 0.196346        |
| LCMT2      | 5.4327     | 6.69266    | 7.06394   | 5.48798   | 6.69382   | 6.75546   | 8.26037    | 7.59335     | 7.19359   | 0.864741        |
| LOC1005046 | 0.200681   | 0.193478   | 0         | 0.277451  | 0.186796  | 0.0651892 | 0.075431   | 0.298938    | 0         | 1               |
| MEN1       | 20.5942    | 21.9127    | 20.8865   | 19.6747   | 19.3838   | 17.8321   | 17.8685    | 15.6481     | 17.8446   | 0.483953        |
| MEPCE      | 19.3681    | 18.0825    | 16.3473   | 21.3565   | 21.7647   | 19.7355   | 19.1719    | 18.9057     | 17.1735   | 0.545882        |
| METTL1     | 15.6196    | 15.6188    | 15.5382   | 15.1857   | 15.7675   | 13.4369   | 16.8554    | 16.8844     | 18.5137   | 0.963971        |
| METTL10    | 14.7645    | 19.7195    | 15.6593   | 16.1394   | 17.9199   | 18.8507   | 18.6057    | 16.1321     | 22.2588   | 0.806036        |
| METTL11B   | 0          | 0          | 0         | 0         | 0         | 0         | 0          | 0           | 0         | 1               |
| METTL13    | 6.75054    | 7.0688     | 6.16272   | 7.81137   | 7.04956   | 6.41337   | 6.12869    | 6.02674     | 6.96469   | 0.939899        |
| METTL14    | 9.8352     | 13.415     | 12.9633   | 10.6937   | 10.6558   | 14.1896   | 16.1725    | 12.2867     | 13.1887   | 0.748893        |
| METTL15    | 5.3843     | 3.18035    | 3.43159   | 4.26861   | 4.70387   | 3.79393   | 4.81982    | 3.51403     | 4.75466   | 0.761538        |
| METTL16    | 16.3208    | 18.0537    | 18.3183   | 14.1656   | 13.3474   | 15.406    | 15.0618    | 16.9602     | 17.5263   | 0.242956        |
| METTL17    | 8.09335    | 8.76846    | 6.69453   | 8.37207   | 7.61389   | 6.73612   | 8.05917    | 8.12655     | 8.00546   | 0.951806        |
| METTL18    | 3.73501    | 4.52036    | 4.7249    | 4.58619   | 4.01163   | 4.57365   | 4.18656    | 3.68679     | 4.32052   | 0.999196        |
| METTL2     | 11.8577    | 13.927     | 13.3403   | 12.7408   | 12.9659   | 12.2459   | 13.2441    | 14.0987     | 12.4701   | 0.963878        |
| METTL21A   | 5.56299    | 10.2774    | 6.84044   | 8.61716   | 8.06393   | 8.31193   | 7.55859    | 6.57373     | 7.34974   | 0.815706        |
| METTL21C   | 0.0409801  | 0.0323952  | 0.0747846 | 0.0383936 | 0         | 0.137264  | 0.239068   | 0           | 0.0668495 | 1               |
| METTL21D   | 12.5746    | 16.3382    | 13.7991   | 15.2966   | 14.5762   | 15.1101   | 17.2479    | 14.7152     | 16.0433   | 0.778973        |
| METTL21E   | 0          | 0          | 0         | 0         | 0.0121362 | 0         | 0          | 0.0111804   | 0         | 1               |
| METTL22    | 7.18179    | 6.14448    | 6.42318   | 7.64938   | 7.13903   | 6.39706   | 6.31023    | 7.08699     | 7.50552   | 0.906071        |
| METTL23    | 12.1925    | 11.1016    | 12.449    | 13.7434   | 13.6659   | 10.0388   | 10.2329    | 9.54214     | 12.2967   | 0.998285        |

|          |           |           |           |           |           |           |           |           |           |           |
|----------|-----------|-----------|-----------|-----------|-----------|-----------|-----------|-----------|-----------|-----------|
| METTL24  | 0.0415403 | 0.0275155 | 0.0612987 | 0.0765396 | 0         | 0.0834978 | 0         | 0         | 0.0532221 | 1         |
| METTL25  | 2.39737   | 3.32597   | 3.08043   | 3.19505   | 3.93625   | 3.10593   | 3.99429   | 3.28242   | 4.50011   | 0.563791  |
| METTL3   | 12.0028   | 12.9546   | 11.5872   | 11.3423   | 10.898    | 10.0163   | 9.43897   | 13.5886   | 12.1805   | 0.763867  |
| METTL4   | 4.27909   | 3.77298   | 4.2411    | 5.28571   | 4.7556    | 4.88478   | 4.50762   | 3.47985   | 4.18331   | 0.525689  |
| METTL5   | 20.2198   | 18.4199   | 19.4808   | 17.0362   | 17.2759   | 20.1505   | 19.6536   | 17.4916   | 16.6394   | 0.99461   |
| METTL6   | 19.7363   | 17.2525   | 17.6192   | 19.5149   | 20.4373   | 21.8093   | 17.3588   | 17.5219   | 18.6702   | 0.66607   |
| METTL7A1 | 7.34745   | 6.45986   | 7.10881   | 10.2298   | 10.6836   | 7.71048   | 10.5445   | 9.05638   | 9.06917   | 0.0691547 |
| METTL7A3 | 0         | 0.0269398 | 0         | 0         | 0         | 0         | 0         | 0         | 0         | 1         |
| METTL7B  | 0.522331  | 0.0303506 | 0.0697036 | 0.0818787 | 0.587875  | 0.253675  | 0.147049  | 0.0364259 | 0.121111  | 1         |
| METTL8   | 4.67032   | 3.76136   | 4.10976   | 4.72083   | 4.19947   | 4.59889   | 4.71734   | 3.78026   | 4.53949   | 0.823409  |
| METTL9   | 45.9156   | 44.9255   | 45.4999   | 56.5468   | 59.886    | 51.4213   | 54.9516   | 41.0877   | 45.1262   | 0.153237  |
| MGMT     | 55.9383   | 48.5363   | 50.2758   | 54.9927   | 56.6051   | 45.0326   | 40.1303   | 52.3992   | 53.3647   | 0.847298  |
| MLL1     | 3.51784   | 3.38486   | 3.3928    | 2.64628   | 2.80356   | 2.80016   | 2.42717   | 3.93069   | 3.08348   | 0.0680466 |
| MLL2     | 1.88018   | 1.90596   | 1.61022   | 1.65311   | 1.73643   | 1.80451   | 1.40548   | 2.04674   | 1.69758   | 0.700966  |
| MLL3     | 1.42159   | 1.33616   | 1.30667   | 1.46039   | 1.74934   | 1.44336   | 1.29156   | 1.26299   | 1.16518   | 0.613279  |
| MLL5     | 10.7138   | 8.90417   | 10.1284   | 10.7243   | 11.9977   | 10.7759   | 12.3048   | 9.70562   | 9.26196   | 0.554818  |
| MRM1     | 6.11171   | 8.11919   | 7.76894   | 7.23132   | 6.67197   | 5.99758   | 6.88909   | 7.77083   | 6.61328   | 0.76315   |
| MTR      | 3.22584   | 4.94333   | 2.91632   | 3.21919   | 3.06318   | 3.73289   | 3.48878   | 2.56261   | 3.63384   | 0.798388  |
| MTRR     | 6.23416   | 6.61275   | 4.46584   | 7.42483   | 7.63737   | 6.1715    | 6.03487   | 6.147     | 6.11428   | 0.392437  |
| N6AMT1   | 11.4532   | 11.1516   | 13.0501   | 12.0531   | 12.9639   | 10.0183   | 11.2389   | 10.3144   | 11.8465   | 0.99461   |
| N6AMT2   | 24.5725   | 28.0766   | 27.0431   | 27.9446   | 26.3728   | 24.6557   | 26.9482   | 22.8231   | 29.1612   | 0.994149  |
| NDUFAF5  | 3.89318   | 3.28404   | 4.59418   | 3.35739   | 2.80407   | 3.76232   | 4.76681   | 3.02837   | 3.60115   | 0.87237   |
| NDUFAF7  | 9.43063   | 7.50058   | 9.92143   | 10.7363   | 9.78353   | 10.3414   | 11.319    | 8.59575   | 9.78638   | 0.403745  |
| NNMT     | 0         | 0.0374888 | 0         | 0.778077  | 0.977505  | 0.473299  | 0.592843  | 0.227655  | 0.0378442 | 0.28801   |
| NOP2     | 36.836    | 39.5947   | 44.2824   | 33.1138   | 32.866    | 36.8623   | 40.9471   | 38.7452   | 37.9215   | 0.526289  |
| NSD1     | 10.0921   | 14.4732   | 9.53292   | 11.1714   | 10.9934   | 11.3909   | 11.2575   | 9.88678   | 9.93282   | 0.96749   |
| NSUN2    | 55.1281   | 81.6171   | 57.8207   | 64.3274   | 68.174    | 66.3768   | 89.7614   | 58.9172   | 63.9059   | 0.519316  |
| NSUN3    | 3.89601   | 4.28715   | 4.31293   | 5.11915   | 5.37655   | 4.62557   | 4.33253   | 5.09318   | 5.0625    | 0.693795  |
| NSUN4    | 7.67734   | 6.75308   | 5.34688   | 7.57648   | 8.82234   | 5.7338    | 5.89288   | 5.86234   | 7.70531   | 0.824364  |
| NSUN5    | 6.98372   | 6.72174   | 6.39017   | 7.03041   | 4.94865   | 7.54784   | 7.40012   | 6.22304   | 6.93846   | 0.999196  |
| NSUN6    | 2.59403   | 2.41608   | 2.3213    | 2.82455   | 3.00494   | 2.6768    | 2.21173   | 2.37551   | 2.64669   | 0.823788  |
| NSUN7    | 0.0165888 | 0.0837546 | 0.0414476 | 0.0156947 | 0         | 0         | 0.0145907 | 0.0290085 | 0.0246809 | 1         |
| NTMT1    | 32.4014   | 38.499    | 41.188    | 28.5498   | 26.2958   | 32.3685   | 33.8762   | 32.8842   | 31.4952   | 0.230425  |
| OCLN     | 38.3946   | 51.6282   | 42.0906   | 33.4541   | 37.1448   | 34.9876   | 37.2189   | 40.5535   | 38.9758   | 0.15408   |
| PCMT1    | 53.3328   | 61.0315   | 60.0232   | 50.2368   | 48.1917   | 53.1181   | 55.7503   | 50.8233   | 52.76     | 0.523544  |
| PCMTD1   | 8.83384   | 7.53091   | 7.82722   | 8.03702   | 7.32474   | 6.97313   | 6.77249   | 8.47831   | 6.84064   | 0.654466  |
| PCMTD2   | 22.1663   | 16.2817   | 19.4683   | 21.5016   | 22.4165   | 16.8422   | 17.1585   | 18.4648   | 16.8238   | 0.954665  |
| PEMT     | 3.08276   | 2.07972   | 4.06632   | 3.96206   | 4.07287   | 3.64748   | 4.49341   | 2.35604   | 4.65637   | 0.553861  |
| PNMT     | 0         | 0         | 0         | 0         | 0         | 0         | 0         | 0         | 0         | 1         |
| PRDM1    | 0.117424  | 0.86606   | 0.15179   | 0.39386   | 0.29018   | 0.364397  | 0.10748   | 0.242791  | 0.257382  | 1         |
| PRDM10   | 2.37809   | 2.34528   | 2.37315   | 2.12231   | 2.30201   | 2.24076   | 2.08283   | 2.03168   | 2.1934    | 0.88348   |
| PRDM11   | 0.0799678 | 0.0723006 | 0.102169  | 0.173239  | 0.175722  | 0.296503  | 0.192636  | 0.404348  | 0.176039  | 1         |
| PRDM12   | 0         | 0         | 0         | 0.0234559 | 0         | 0         | 0.0398663 | 0         | 0.0163636 | 1         |
| PRDM13   | 0         | 0         | 0         | 0         | 0         | 0         | 0         | 0         | 0         | 1         |
| PRDM14   | 0         | 0         | 0         | 0         | 0.0189476 | 0.0144766 | 0.0335797 | 0         | 0.0139762 | 1         |
| PRDM15   | 2.58118   | 2.53758   | 1.78814   | 2.19449   | 2.11045   | 2.2718    | 1.74182   | 2.15117   | 1.96924   | 0.798388  |
| PRDM2    | 11.4049   | 10.1316   | 8.47125   | 9.52272   | 8.65231   | 8.2441    | 7.01049   | 7.72479   | 7.4398    | 0.244194  |
| PRDM4    | 16.7491   | 18.4436   | 17.2134   | 15.9719   | 16.8413   | 16.0974   | 15.1055   | 15.5784   | 15.5585   | 0.751995  |
| PRDM5    | 7.5622    | 6.98802   | 6.59049   | 7.52472   | 8.18111   | 8.04133   | 7.22515   | 8.05284   | 7.76095   | 0.667891  |
| PRDM6    | 0         | 0         | 0         | 0         | 0         | 0         | 0         | 0.0180316 | 0         | 1         |
| PRDM9    | 1.01923   | 0.789558  | 0.621377  | 1.00552   | 0.921209  | 1.28656   | 1.09528   | 0.862402  | 0.758308  | 0.390757  |
| PRMT1    | 105.705   | 149.138   | 133.512   | 84.2463   | 91.5802   | 106.311   | 118.394   | 120.579   | 120.877   | 0.0502682 |
| PRMT10   | 5.4373    | 5.83688   | 5.63624   | 5.85593   | 4.6767    | 5.29425   | 4.02002   | 5.22166   | 5.60455   | 0.674515  |
| PRMT2    | #N/A      | 0.710755  |
| PRMT3    | 23.1393   | 27.9448   | 28.9898   | 26.7911   | 28.4664   | 27.2832   | 30.6519   | 28.8247   | 29.1178   | 0.768779  |
| PRMT5    | 43.5165   | 43.4203   | 47.0423   | 42.0711   | 41.9911   | 43.5736   | 45.2323   | 37.0634   | 43.1398   | 0.910169  |
| PRMT6    | 11.1115   | 12.8823   | 13.0306   | 14.9727   | 16.8371   | 15.5495   | 14.3096   | 13.1656   | 12.9584   | 0.23935   |
| PRMT7    | 25.593    | 28.9606   | 33.9714   | 26.9096   | 25.5127   | 29.9437   | 33.1699   | 27.89     | 33.0323   | 0.981129  |
| PRMT8    | 0         | 0         | 0         | 0         | 0.0190041 | 0         | 0         | 0         | 0         | 1         |
| RBBP5    | 10.9776   | 12.0551   | 11.4705   | 11.654    | 11.03     | 12.2143   | 12.0036   | 10.5311   | 11.3442   | 0.948088  |
| RNMT     | 15.9042   | 15.9588   | 16.9895   | 14.5062   | 16.6209   | 15.1839   | 14.8023   | 16.2485   | 14.5968   | 0.812471  |
| RNMTL1   | 5.25003   | 5.11532   | 4.72669   | 7.27445   | 6.46951   | 6.24497   | 5.39715   | 4.8968    | 5.58694   | 0.383404  |
| RRNAD1   | 7.3253    | 6.56614   | 5.64503   | 6.12774   | 6.15181   | 5.41264   | 5.55645   | 6.26158   | 6.06069   | 0.812471  |
| RRP8     | 12.2907   | 13.0347   | 12.2394   | 10.663    | 10.2911   | 12.5769   | 12.5451   | 11.7541   | 12.271    | 0.881507  |
| SETD1A   | 12.569    | 15.1051   | 14.0807   | 11.0732   | 11.3527   | 13.6367   | 14.1929   | 13.2645   | 13.8962   | 0.588621  |
| SETD1B   | 3.35127   | 3.52708   | 3.38245   | 3.18514   | 3.89777   | 3.40198   | 3.77716   | 3.72063   | 3.2034    | 0.931733  |
| SETD2    | 10.3888   | 11.1185   | 10.4364   | 9.35066   | 9.53652   | 11.5479   | 10.4661   | 11.0786   | 10.3658   | 0.939822  |
| SETD3    | 31.5992   | 34.6059   | 34.8055   | 27.3595   | 27.4013   | 28.1125   | 34.7574   | 33.3345   | 34.9738   | 0.416462  |

Not altered

|          |           |           |           |           |           |           |          |           |           |             |
|----------|-----------|-----------|-----------|-----------|-----------|-----------|----------|-----------|-----------|-------------|
| SETD4    | 2.84898   | 2.99329   | 1.76323   | 2.0788    | 1.52669   | 1.19756   | 0.667002 | 2.00847   | 1.53061   | 0.0653856   |
| SETD6    | 21.7058   | 24.5056   | 25.9376   | 16.4846   | 18.6153   | 19.7729   | 22.1381  | 21.3143   | 20.9355   | 0.179924    |
| SETD8    | 110.15    | 114.45    | 104.198   | 88.8003   | 92.7398   | 81.4738   | 104.002  | 89.5518   | 100.35    | 0.225088    |
| SETDB1   | 11.3657   | 11.5966   | 10.7985   | 11.4902   | 12.4822   | 13.3575   | 13.1869  | 11.3585   | 12.1092   | 0.823788    |
| SETDB2   | 3.20008   | 3.56511   | 3.74514   | 4.44647   | 4.65429   | 4.20396   | 3.92703  | 3.42944   | 4.5673    | 0.361722    |
| SETMAR   | 2.00888   | 1.78468   | 2.2434    | 1.8883    | 2.56429   | 2.29972   | 2.68704  | 2.38533   | 1.75748   | 0.667891    |
| SMYD1    | 0.0252614 | 0.0284692 | 0.0108494 | 0.0470658 | 0.0251803 | 0.0198276 | 0        | 0.0228655 | 0.0191434 | 1           |
| SMYD2    | 48.8248   | 52.5835   | 49.6562   | 45.5615   | 43.4334   | 43.679    | 47.5784  | 52.294    | 52.1613   | 0.580626    |
| SMYD3    | 3.0473    | 2.69189   | 2.95383   | 3.07952   | 3.57349   | 2.99045   | 3.32077  | 2.60437   | 3.21693   | 0.748347    |
| SMYD4    | 1.98703   | 1.7333    | 1.86602   | 2.24684   | 2.01037   | 2.14547   | 2.06716  | 1.51427   | 1.83343   | 0.710936    |
| SMYD5    | 12.3271   | 13.5175   | 14.4247   | 12.6034   | 13.0419   | 12.6853   | 14.4807  | 13.635    | 16.3357   | 0.986059    |
| SUV39H1  | 16.9396   | 18.0085   | 19.1684   | 14.3775   | 13.569    | 18.8393   | 20.7771  | 16.4017   | 21.0107   | 0.797632    |
| SUV39H2  | 3.03624   | 2.56893   | 2.854     | 2.86624   | 2.63969   | 5.04864   | 4.63617  | 2.72963   | 3.7636    | 0.232282    |
| SUV420H1 | 10.059    | 8.69793   | 9.7962    | 11.0573   | 11.5573   | 8.91064   | 9.98304  | 9.10293   | 8.55732   | 0.696964    |
| SUV420H2 | 14.492    | 11.9458   | 10.0663   | 14.8636   | 12.2944   | 15.6642   | 13.8978  | 12.2206   | 12.7864   | 0.513735    |
| TFB1M    | 3.88829   | 4.34729   | 5.09018   | 6.30016   | 6.01507   | 5.52062   | 5.32923  | 3.86731   | 5.62711   | 0.569074    |
| TFB2M    | 3.64959   | 4.0878    | 3.91009   | 3.50825   | 3.80706   | 3.34244   | 3.23368  | 3.34936   | 3.36576   | 0.783161    |
| TGS1     | 5.63973   | 5.35109   | 4.61018   | 5.43413   | 5.45779   | 5.89394   | 5.56188  | 5.59032   | 5.89842   | 0.710151    |
| THUMPD2  | 1.98478   | 2.03208   | 2.91106   | 1.7906    | 1.8629    | 2.31153   | 1.79566  | 2.05932   | 2.69159   | 0.698894    |
| THUMPD3  | 23.0158   | 23.3196   | 24.8967   | 22.0365   | 23.6528   | 24.1481   | 22.8393  | 27.6816   | 24.0228   | 0.980243    |
| TOMT     | 0.809417  | 1.09796   | 0.947787  | 1.13095   | 0.9706    | 1.03953   | 1.79082  | 0.855639  | 0.999326  | 0.8763      |
| TPMT     | 2.00216   | 3.73534   | 2.7549    | 2.3734    | 2.37646   | 2.46829   | 2.66134  | 1.85255   | 1.79961   | 0.719472    |
| TRDMT1   | 1.93996   | 1.84426   | 2.05122   | 2.16298   | 1.92421   | 2.69469   | 3.2173   | 2.32648   | 2.54866   | 0.393998    |
| TRMT1    | 31.2716   | 31.5435   | 32.1308   | 34.6614   | 38.4021   | 29.2803   | 34.4204  | 31.9359   | 35.6423   | 0.722206    |
| TRMT10A  | 4.25335   | 5.05374   | 4.021     | 3.88799   | 3.56777   | 4.9319    | 5.02261  | 5.64296   | 5.89424   | 0.951247    |
| TRMT10B  | 7.95717   | 6.85041   | 6.4949    | 6.92603   | 7.35147   | 6.45203   | 7.61444  | 6.81928   | 6.79426   | 0.993072    |
| TRMT10C  | 20.7095   | 22.8587   | 23.2784   | 21.125    | 24.1935   | 24.4561   | 26.7661  | 24.0543   | 23.1127   | 0.672255    |
| TRMT11   | 8.85693   | 7.80389   | 9.01131   | 10.2335   | 10.4113   | 9.16322   | 11.2792  | 8.74564   | 10.705    | 0.288404    |
| TRMT112  | 19.7703   | 19.6373   | 20.6276   | 24.0887   | 28.2461   | 22.0163   | 28.4115  | 17.9576   | 21.8752   | 0.587811    |
| TRMT12   | 1.77757   | 2.29075   | 2.04736   | 2.21264   | 2.41774   | 2.58346   | 2.32312  | 2.83962   | 2.23841   | 0.589913    |
| TRMT13   | 2.22855   | 2.88012   | 2.13585   | 2.89847   | 2.24263   | 2.84007   | 2.31734  | 2.78978   | 2.2114    | 0.931733    |
| TRMT1L   | 13.3176   | 11.4693   | 9.52417   | 12.402    | 13.1193   | 9.71121   | 9.18714  | 10.6974   | 10.5661   | 0.967105    |
| TRMT2A   | 13.3284   | 14.4173   | 14.565    | 14.6356   | 12.5095   | 16.7774   | 16.519   | 15.9253   | 16.0155   | 0.765334    |
| TRMT2B   | 13.3606   | 16.7085   | 15.4098   | 18.8957   | 15.5417   | 18.459    | 19.3475  | 16.8248   | 16.922    | 0.390892    |
| TRMT44   | 2.75077   | 3.08392   | 2.38426   | 2.85372   | 3.2329    | 2.98673   | 2.6834   | 3.15105   | 2.53438   | 0.872037    |
| TRMT5    | 14.657    | 14.3388   | 15.2679   | 15.2799   | 14.5427   | 15.0219   | 15.0212  | 15.8138   | 15.9246   | 0.948088    |
| TRMT6    | 23.4516   | 25.8003   | 24.7108   | 20.1913   | 20.3924   | 22.6723   | 24.7633  | 22.1072   | 23.4763   | 0.559677    |
| TRMT61A  | 8.41775   | 7.96898   | 8.20089   | 8.47931   | 8.47027   | 8.4851    | 8.53371  | 9.25589   | 9.62946   | 0.944468    |
| TRMT61B  | 12.6108   | 15.9977   | 15.8251   | 12.4412   | 12.0685   | 12.9992   | 12.7567  | 18.5399   | 17.074    | 0.667444    |
| TRMU     | 5.03164   | 5.04924   | 5.23824   | 5.67908   | 5.00818   | 5.32968   | 5.1436   | 5.86967   | 5.30146   | 0.940492    |
| TYW3     | 0.583674  | 0.693735  | 0.638416  | 0.825401  | 0.776054  | 0.734505  | 0.653149 | 0.430021  | 0.660877  | 0.821456    |
| WBP7     | 10.0876   | 10.0939   | 9.53541   | 8.86454   | 8.44965   | 9.62627   | 8.31503  | 10.088    | 8.55964   | 0.486998    |
| WBSCR22  | 31.9264   | 32.3937   | 35.4031   | 32.7078   | 30.8665   | 35.235    | 39.5557  | 32.3592   | 31.154    | 0.921286    |
| WBSCR27  | 7.01364   | 5.96102   | 4.97991   | 5.69112   | 6.04684   | 4.83113   | 4.10661  | 5.57905   | 6.09378   | 0.643248    |
| WDR4     | 9.15756   | 10.7359   | 9.40643   | 9.17896   | 9.29545   | 8.92328   | 10.0065  | 8.59572   | 11.3281   | 0.881507    |
| WDR5     | 35.6568   | 34.4646   | 37.5691   | 30.9836   | 32.1388   | 33.3064   | 36.352   | 31.6773   | 37.7096   | 0.726234    |
| WDR82    | 24.6898   | 25.6915   | 25.9649   | 25.9911   | 27.7902   | 26.5122   | 28.1793  | 23.8283   | 25.0166   | 0.743452    |
| WHSC1    | 19.7873   | 20.6953   | 22.5922   | 20.6437   | 20.1106   | 25.2013   | 28.2441  | 19.5204   | 25.6301   | 0.449895    |
| WHSC1L1  | 12.5716   | 12.6514   | 13.257    | 11.3957   | 11.953    | 13.1631   | 13.2444  | 12.788    | 11.8762   | 0.929952    |
| ZCCHC4   | 4.49342   | 5.39814   | 4.12001   | 3.71085   | 3.59143   | 4.42052   | 4.18071  | 4.62315   | 4.72993   | 0.634771    |
|          |           |           |           |           |           |           |          |           |           |             |
| DNMT1    | 21.105    | 26.9581   | 24.8415   | 29.3271   | 26.1587   | 39.8165   | 32.7572  | 26.4514   | 31.2404   | 0.0181179   |
| DNMT3A   | 2.8983    | 2.32813   | 2.21564   | 4.07874   | 4.48797   | 3.32995   | 3.62358  | 2.59661   | 2.86093   | 0.00137803  |
| HNMT     | 0.213158  | 0         | 0.0221341 | 0.779368  | 0.916959  | 1.37678   | 1.33482  | 0.751757  | 0.344345  | 0.0115951   |
| METTL20  | 10.9273   | 5.02089   | 9.1461    | 16.0794   | 20.9864   | 17.2483   | 24.3454  | 7.18788   | 8.88697   | 0.000509378 |
| PRDM8    | 0.921814  | 1.44237   | 1.16091   | 0.470453  | 0.454765  | 0.244426  | 0.29933  | 1.32359   | 0.616615  | 0.00488246  |
| SETD7    | 27.9871   | 33.4685   | 27.0955   | 22.0261   | 19.5296   | 16.4429   | 13.1429  | 31.3229   | 25.6157   | 0.000509378 |

**Significant  
t changes**

Supplementary Table 2. Curated list of S-adenosyl-methionine utilizing enzymes (Proteomics)

| Name     | K cells    |            |            |            | K cells    |            |            |            |
|----------|------------|------------|------------|------------|------------|------------|------------|------------|
|          | K-1-1      | K-2-1      | K-1-2      | K-2-2      | KL-1-1     | KL-2-1     | KL-1-2     | KL-2-2     |
| AS3MT    | 263016.554 | 375524.261 | 257327.136 | 292989.071 | 291409.169 | 318404.437 | 253289.521 | 272850.151 |
| ASH1L    | 272229.112 | 282100.649 | 240983.889 | 223796.889 | 302254.612 | 332189.331 | 322267.842 | 304036.204 |
| ASH2L    | 238541.823 | 332388.084 | 235621.035 | 294893.272 | 305059.171 | 286718.112 | 296546.17  | 295272.611 |
| CARM1    | 298020.697 | 291367.191 | 301665.491 | 282830.231 | 318474.69  | 297958.931 | 251003.454 | 238157.203 |
| COMTD1   | 234867.041 | 327426.184 | 305559.572 | 426500.479 | 216398.734 | 196070.989 | 270681.404 | 235198.712 |
| COQ3     | 364453.02  | 267959.746 | 323839.535 | 252603.667 | 335120.145 | 272936.358 | 225623.821 | 227260.118 |
| COQ5     | 314429.216 | 227609.241 | 296117.559 | 279863.803 | 286092.618 | 315736.321 | 251305.115 | 254276.616 |
| CXXC1    | 220759.651 | 285810.256 | 240321.647 | 328944.855 | 268395.561 | 305093.753 | 303541.505 | 307343.175 |
| DIMT1    | 347007.454 | 224579.63  | 264253.761 | 208295.334 | 341243.809 | 289859.639 | 330034.19  | 321965.469 |
| DOT1L    | 267109.856 | 300093.619 | 238557.968 | 249826.131 | 283257.63  | 301129.168 | 350947.651 | 330180.516 |
| DPH5     | 283953.509 | 309243.131 | 267779.749 | 245535.979 | 322789.29  | 296865.457 | 303025.459 | 278112.88  |
| EHMT1    | 250625.024 | 292407.031 | 222213.75  | 257106.613 | 288235.907 | 303714.004 | 328579.764 | 354287.824 |
| EHMT2    | 281190.32  | 314162.972 | 251374.98  | 281116.048 | 303948.078 | 273310.578 | 309663.07  | 300728.792 |
| EMG1     | 226266.098 | 268909.211 | 200582.655 | 273842.485 | 315205.028 | 357807.732 | 274735.262 | 349688.193 |
| EZH1     | 220806.356 | 291089.238 | 233843.449 | 303084.562 | 273279.438 | 314527.902 | 304245.839 | 322260.99  |
| EZH2     | 250026.905 | 285211.973 | 208612.687 | 252144.08  | 301173.305 | 304607.619 | 350613.957 | 367166.629 |
| FBL      | 342194.042 | 292668.883 | 253987.087 | 276521.728 | 295656.284 | 258684.671 | 248203.151 | 281495.861 |
| FTSJ1    | 300924.22  | 294284.69  | 276049.66  | 262925.485 | 363464.52  | 247443.419 | 322612.164 | 299447.799 |
| FTSJ2    | 268687.109 | 257640.284 | 291486.067 | 382676.845 | 241152.664 | 257955.634 | 242552.929 | 274242.404 |
| FTSJ3    | 255194.529 | 234595.733 | 208404.949 | 244185.866 | 281637.142 | 318364.993 | 351172.574 | 363840.671 |
| ICMT     | 256954.181 | 216459.638 | 324269.524 | 249455.214 | 282900.053 | 258001.102 | 299416.871 | 348016.746 |
| MEN1     | 245806.046 | 368905.043 | 209750.365 | 304319.843 | 248457.732 | 320556.593 | 293522.865 | 301572.969 |
| MEPCE    | 209493.979 | 247258.172 | 205106.902 | 283712.497 | 324705.088 | 351864.577 | 286393.949 | 293591.608 |
| METTL1   | 368541.408 | 258794.787 | 375977.881 | 230675.031 | 371118.715 | 276030.01  | 259529.597 | 212865.456 |
| METTL10  | 391179.722 | 318159.775 | 351597.146 | 230646.361 | 273158.439 | 294696.42  | 245173.3   | 265107.346 |
| METTL13  | 308951.361 | 262064.375 | 247642.866 | 216708.145 | 336223.014 | 312137.785 | 285996.005 | 298849.647 |
| METTL14  | 301180.528 | 328610.028 | 249316.323 | 204464.293 | 349545.917 | 311752.932 | 272317.608 | 325369.707 |
| METTL15  | 252650.103 | 309123.325 | 289486.361 | 337215.75  | 242819.991 | 244097.224 | 292148.216 | 271823.43  |
| METTL16  | 222511.72  | 317046.262 | 268980.863 | 330655.686 | 282380.647 | 291610.954 | 297134.69  | 263744.126 |
| METTL17  | 258182.608 | 235422.592 | 278011.249 | 300954.564 | 278873.225 | 259422.907 | 289862.356 | 304525.026 |
| METTL18  | 260118.329 | 323546.18  | 248154.595 | 258895.821 | 340954.693 | 276339.991 | 363730.668 | 314830.532 |
| METTL3   | 323203.772 | 228929.004 | 244107.498 | 202680.964 | 386535.639 | 354877.357 | 302034.434 | 279749.002 |
| METTL7A1 | 161125.044 | 331080.314 | 236074.58  | 409205.989 | 245460.722 | 281214.908 | 272102.161 | 246000.988 |
| METTL9   | 369786.632 | 153411.536 | 317276.837 | 248489.999 | 408730.845 | 381231.731 | 144653.535 | 146750.788 |
| MGMT     | 358106.938 | 295374.348 | 191253.439 | 292759.01  | 463578.797 | 369518.595 | 176617.857 | 197014.931 |
| MRM1     | 232244.071 | 288007.796 | 263434.951 | 324013.414 | 239088.066 | 316687.1   | 243799.577 | 261375.475 |
| MTR      | 308149.324 | 234961.503 | 399856.963 | 206004.7   | 259641.925 | 300643.095 | 256945.603 | 275566.769 |
| MTRR     | 354326.738 | 224952.212 | 381596.268 | 225334.795 | 283345.077 | 221719.158 | 330471.408 | 272648.169 |
| NGAMT1   | 342066.073 | 272870.078 | 337823.037 | 265222.918 | 338809.158 | 248842.024 | 275027.465 | 242131.261 |
| NDUFAF5  | 315362.524 | 277105.331 | 332021.019 | 320175.897 | 245955.357 | 242518.757 | 252547.067 | 244454.87  |
| NDUFAF7  | 243472.238 | 292305.012 | 279791.922 | 347054.981 | 257083.325 | 282016.699 | 229202.972 | 238653.391 |
| NOP2     | 232907.347 | 283639.969 | 215314.776 | 241550.192 | 292195.859 | 281315.078 | 331755.703 | 374817.3   |
| NSD1     | 349964.63  | 284049.085 | 271299.134 | 244081.293 | 312758.574 | 284459.995 | 295400.751 | 286115.008 |
| NSUN2    | 293215.984 | 248068.14  | 234822.122 | 233500.231 | 430104.706 | 305149.563 | 291690.639 | 288577.94  |
| NSUN3    | 232904.009 | 267875.095 | 333136.434 | 260831.456 | 301570.142 | 268848.713 | 280011.939 | 260519.919 |
| NSUN4    | 246722.406 | 288222.844 | 270957.788 | 295020.633 | 252759.477 | 316096.618 | 255586.129 | 293962.505 |
| NSUN5    | 219421.068 | 299274.036 | 231170.406 | 273813.422 | 285625.716 | 270518.846 | 360473.724 | 330983.359 |
| NTMT1    | 318319.155 | 296675.664 | 333835.279 | 261569.961 | 237682.193 | 249646.235 | 338635.087 | 348050.039 |
| PCMT1    | 386981.396 | 261278.53  | 327424.738 | 271679.745 | 289166.417 | 255611.418 | 261874.301 | 258671.726 |
| PCMTD2   | 327478.985 | 320587.683 | 261052.693 | 291176.248 | 404023.902 | 339878.956 | 193937.369 | 194382.03  |
| PRDM10   | 241230.872 | 413497.427 | 247479.501 | 310449.642 | 220699.248 | 252681.105 | 297858.995 | 314280.334 |
| PRDM15   | 238371.886 | 315040.057 | 221124.508 | 311608.569 | 248419.924 | 278607.836 | 322989.055 | 341332.739 |
| PRDM2    | 312018.619 | 248602.988 | 259982.941 | 212748.858 | 326650.936 | 368198.121 | 299431.958 | 267280.218 |

Not altered

|         |            |            |            |            |            |            |            |            |
|---------|------------|------------|------------|------------|------------|------------|------------|------------|
| PRDM5   | 191462.01  | 312154.358 | 209900.216 | 286450.597 | 273553.562 | 334106.35  | 282611.122 | 324573.734 |
| PRMT1   | 333199.107 | 235865.078 | 291631.314 | 244318.134 | 367872.777 | 326025.367 | 238390.974 | 239856.526 |
| PRMT3   | 280367.52  | 280030.168 | 263710.308 | 238852.919 | 337939.314 | 278521.46  | 300908.661 | 306672.271 |
| PRMT5   | 260043.82  | 278796.235 | 244246.334 | 258861.453 | 334133.979 | 324693.334 | 282991.094 | 289819.308 |
| PRMT7   | 300851.962 | 302452.572 | 271263.753 | 235427.929 | 315501.823 | 284060.229 | 306135.962 | 293669.01  |
| RBBP5   | 220505.591 | 357242.003 | 257259.44  | 346846.148 | 242747.024 | 254008.603 | 290106.896 | 314735.795 |
| RNMT    | 260832.215 | 328839.402 | 284858.861 | 331698.393 | 277179.139 | 307221.9   | 223585.392 | 212424.155 |
| RNMTL1  | 262016.762 | 277789.088 | 262266.235 | 340564.772 | 268435.919 | 263736.832 | 258425.391 | 274542.369 |
| RRP8    | 198469.336 | 229544.666 | 207455.842 | 306206.632 | 246013.237 | 311361.719 | 310884.864 | 340781.886 |
| SETD1A  | 232934.367 | 249788.99  | 257480.227 | 288004.591 | 300387.529 | 341162.576 | 287844.26  | 277934.678 |
| SETD1B  | 222061.879 | 293028.167 | 262564.627 | 349048.344 | 249574.494 | 317682.819 | 247893.965 | 258128.033 |
| SETD2   | 244142.83  | 301706.347 | 238876.239 | 271277.28  | 275323.954 | 303538.985 | 325483.525 | 325262.813 |
| SETD3   | 339617.06  | 274780.606 | 314488.829 | 264630.421 | 251505.784 | 257797.563 | 283173.485 | 284749.91  |
| SETD6   | 335681.478 | 404564.785 | 332083.099 | 240943.487 | 311993.924 | 265961     | 305877.716 | 232646.743 |
| SETD8   | 269477.272 | 374403.601 | 329300.843 | 333763.336 | 208092.97  | 248006.229 | 275933.464 | 243696.79  |
| SETDB1  | 272463.743 | 312478.194 | 240399.574 | 248080.597 | 308391.57  | 318374.204 | 335996.349 | 297336.102 |
| SMYD2   | 264248.562 | 330901.771 | 278708.877 | 296371.478 | 234511.016 | 269506.504 | 279603.598 | 302642.318 |
| SMYD3   | 280421.422 | 343455.341 | 281525.976 | 385042.559 | 209465.955 | 225663.166 | 270218.619 | 289539.536 |
| SMYD5   | 269982.241 | 311702.582 | 288075.938 | 258919.567 | 289926.819 | 297630.112 | 284398.605 | 295891.978 |
| SUV39H1 | 209727.788 | 386868.341 | 158755.383 | 254382.637 | 215924.924 | 225792.617 | 413845.84  | 433806.993 |
| SUV39H2 | 200684.273 | 328098.261 | 193049.305 | 293772.187 | 257974.793 | 277848.856 | 332608.99  | 354179.083 |
| TFB1M   | 225483.314 | 240577.851 | 257459.633 | 353255.008 | 283336.053 | 280207.79  | 279985.268 | 277543.66  |
| TFB2M   | 232291.598 | 275312.19  | 287484.415 | 352074.555 | 225485.515 | 228156.484 | 289411.045 | 280772.463 |
| TGS1    | 237920.773 | 291055.628 | 380818.86  | 195742.068 | 248664.621 | 248098.333 | 319741.669 | 346906.87  |
| THUMPD3 | 279924.076 | 257843.993 | 239272.847 | 210120.948 | 393164.023 | 354432.909 | 294359.329 | 264196.437 |
| TPMT    | 384361.528 | 284035.457 | 446976.305 | 202625.385 | 216859.178 | 283507.624 | 250679.596 | 243584.609 |
| TRMT1   | 266589.374 | 301877.116 | 285473.987 | 271211.885 | 363679.433 | 323612.546 | 254240.949 | 231275.259 |
| TRMT10A | 265900.751 | 271510.282 | 270018.68  | 272482.589 | 438351.103 | 315520.487 | 263133.95  | 240833.5   |
| TRMT10C | 209729.143 | 238003.659 | 292638.225 | 342383.997 | 199496.087 | 276316.483 | 265428.221 | 300727.163 |
| TRMT11  | 198227.587 | 324568.269 | 228701.15  | 385797.37  | 235069.565 | 277680.687 | 230357.7   | 270231.224 |
| TRMT112 | 336110.922 | 250592.718 | 278812.742 | 275801.91  | 333094.222 | 271066.241 | 282939.976 | 272096.975 |
| TRMT1L  | 231541.085 | 252390.182 | 262612.128 | 275410.22  | 379695.215 | 345481.242 | 257097.952 | 230083.362 |
| TRMT2B  | 239455.727 | 312577.175 | 345945.239 | 331270.524 | 212739.413 | 227569.32  | 264320.653 | 284380.613 |
| TRMT5   | 247588.923 | 311866.257 | 263730.627 | 265771.114 | 380861.672 | 359880.547 | 264621.255 | 219847.653 |
| TRMT6   | 248390.067 | 258410.573 | 293644.701 | 261866.373 | 400951.134 | 315641.476 | 261482.011 | 237345.233 |
| TRMT61A | 256053.551 | 199175.158 | 256502.39  | 285138.623 | 439827.452 | 342899.473 | 233679.434 | 241086.084 |
| TRMU    | 232118.366 | 249670.515 | 290290.603 | 314671.735 | 246857.961 | 317271.14  | 236895.99  | 272077.856 |
| WBSR22  | 261592.307 | 266941.248 | 247975.407 | 280382.933 | 325300.423 | 282386.553 | 364884.481 | 311768.875 |
| WBSR27  | 311602.086 | 318527.905 | 317798.251 | 293376.895 | 334793.96  | 307271.862 | 220771.185 | 217504.536 |
| WDR4    | 257562.742 | 357582.172 | 310402.003 | 262944.729 | 357930.943 | 316795.72  | 234621.387 | 229220.677 |
| WDR5    | 214203.786 | 301780.463 | 229413.289 | 299542.124 | 269224.961 | 296059.462 | 314559.987 | 321929.851 |
| WDR82   | 205411.434 | 313144.187 | 251307.704 | 337012.788 | 227374.982 | 268251.796 | 291314.147 | 321829.412 |
| WHSC1L1 | 212943.29  | 366181.062 | 270228.909 | 341087.754 | 246326.367 | 269265.983 | 277934.025 | 276798.375 |
| ZCCHC4  | 249753.798 | 303910.755 | 301558.208 | 277149.045 | 284869.617 | 286093.421 | 269078.547 | 289583.534 |
|         |            |            |            |            |            |            |            |            |
| DNMT1   | 197725.832 | 240930.743 | 160614.592 | 185084.683 | 355969.106 | 317622.407 | 446453.499 | 430659.147 |
| DNMT3A  | 189858.827 | 306977.783 | 158339.612 | 259927.332 | 272720.685 | 376006.029 | 323817.783 | 439092.305 |
| METTL20 | 102663.273 | 281023.793 | 126545.126 | 271889.924 | 270150.796 | 499788.149 | 316175.993 | 364290.876 |
| TRMT2A  | 267183.42  | 249402.062 | 212541.005 | 180536.729 | 444629.885 | 297370.835 | 387480.486 | 302504.095 |
| WHSC1   | 229196.512 | 280026.47  | 185209.5   | 228423.312 | 305683.5   | 295789.758 | 415621.12  | 384048.086 |
| SETDB2  | 230231.458 | 234233.358 | 230133.152 | 216864.875 | 290748.632 | 321188.122 | 356630.52  | 373027.882 |
| ALKBH8  | 274343.97  | 267142.454 | 214756.683 | 198324.592 | 422960.069 | 381248.486 | 268083.263 | 277208.146 |
| SETD7   | 374766.585 | 418773.403 | 371751.411 | 294233.998 | 261921.88  | 220555.902 | 208468.845 | 190327.211 |
| COMT    | 314197.76  | 305330.046 | 371488.356 | 352978.649 | 236113.488 | 254348.824 | 197167.065 | 188746.281 |
| METTL5  | 311930.837 | 395036.531 | 396823.336 | 308077.173 | 151035.644 | 189240.972 | 360276.804 | 251047.162 |
| OCLN    | 275437.8   | 373971.776 | 294286.316 | 365866.633 | 184607.808 | 239172.69  | 220922     | 252005.169 |

**Significant  
changes**

**Supplementary Data Table 3. Bisulfite conversion rates and sequencing statistics for WGBS**

| <b>Sample</b> | <b>Genotype</b>    | <b>Used reads</b> | <b>Number of CpGs</b> | <b>Mean depth</b> | <b>Bisulfite conversion</b> |
|---------------|--------------------|-------------------|-----------------------|-------------------|-----------------------------|
| K1            | KRASG12D/+         | 608,145,650       | 21,225,289            | 11.70             | 0.9964                      |
| K2            | KRASG12D/+         | 584,203,381       | 21,199,148            | 10.53             | 0.9965                      |
| KL1           | KRASG12D/+;LKB1-/- | 583,916,832       | 21,192,517            | 11.03             | 0.9964                      |
| KL2           | KRASG12D/+;LKB1-/- | 688,180,303       | 21,234,711            | 12.49             | 0.9963                      |
